# Supplementary material for: Mutations in CNNM4 Cause Jalili Syndrome, Consisting of Autosomal-Recessive Cone-Rod Dystrophy and Amelogenesis Imperfecta
Source: PubMed Central journal article supplement (PMC2668026; doi:10.1016/j.ajhg.2009.01.009), 2009-02-13
Supplement: mmc1.pdf [file mmc1.pdf]

## Supplemental Data

### **Mutations in *CNNM4* cause Jalili syndrome, consisting of autosomal recessive cone-rod dystrophy and amelogenesis imperfecta**

David A Parry\*, Alan J Mighell\*, Walid El-Sayed, Roger C Shore, Ismail K Jalili, H  l  ne Dollfus, Agnes Bloch-Zupan, Roman Carlos, Ian M Carr, Louise M Downey, Katharine M Blain, David C Mansfield, Mehdi Shahrabi, Mansour Heidari, Parissa Aref, Mohsen Abbasi, Michel Michaelides, Anthony T Moore, Jennifer Kirkham, Chris F Inglehearn.

---

\* These authors contributed equally to this work.

**Table S1. Candidate genes screened for mutations.**

2q11 genes screened for mutations in Jalili Syndrome families. Four novel SNPs (2 synonymous and 2 intronic changes) discovered during screening are shown with respective Submitter SNP ID (SS) numbers. The pathogenic changes in the Jalili syndrome families are also shown. Initial screening was performed on genomic DNA from affected members of the Gaza A, Gaza B and Guatemala families.

| Gene          | Entrez Gene            | OMIM                    | Novel SNPs                                         | Pathogenic change 1                | Pathogenic change 2                     |
|---------------|------------------------|-------------------------|----------------------------------------------------|------------------------------------|-----------------------------------------|
| <i>ACTR1B</i> | <a href="#">10120</a>  | <a href="#">*605144</a> | -                                                  | -                                  | -                                       |
| <i>CNGA3</i>  | <a href="#">1261</a>   | <a href="#">*600053</a> | -                                                  | -                                  | -                                       |
| <i>CNNM3</i>  | <a href="#">26505</a>  | <a href="#">*607804</a> | -                                                  | -                                  | -                                       |
| <i>CNNM4</i>  | <a href="#">26504</a>  | <a href="#">*607805</a> | c.1350C>T (p.=) [Unaffected control] (SS115492347) | c.599C>A; Ser200Tyr [Gaza A]       | c.599C>A; Ser200Tyr [Gaza A]            |
|               |                        |                         |                                                    | c.1312dupC; Leu438ProfsX9 [Kosovo] | c.1312dupC; Leu438ProfsX9 [Kosovo]      |
|               |                        |                         |                                                    | c.1813 C>T; Arg605X [Gaza B]       | c.1813 C>T; Arg605X [Gaza B]            |
|               |                        |                         |                                                    | c.2149C>T; Gln717X [Guatemala]     | c.62_145del; Leu21HisfsX185 [Guatemala] |
|               |                        |                         |                                                    | c.586T>C; Ser196Pro [Turkey]       | c.586T>C; Ser196Pro [Turkey]            |
|               |                        |                         |                                                    | c.1-?_1403+?del [Iran]             | c.1-?_1403+?del [Iran]                  |
|               |                        |                         |                                                    | c.971T>C; Leu324Pro [Scotland]     | c.1690C>T; Gln564X [Scotland]           |
| <i>INPP4A</i> | <a href="#">3631</a>   | <a href="#">*600916</a> | -                                                  | -                                  | -                                       |
| <i>KCNIP3</i> | <a href="#">30818</a>  | <a href="#">*604662</a> | -                                                  | -                                  | -                                       |
| <i>MGAT4A</i> | <a href="#">11320</a>  | <a href="#">*604623</a> | -                                                  | -                                  | -                                       |
| <i>PROM2</i>  | <a href="#">150696</a> | -                       | c.831G>A (p.=) [Gaza B] (SS115492348)              |                                    |                                         |
|               |                        |                         | c.975+21C>A (p.=) [Guatemala] (SS115492350)        |                                    |                                         |
|               |                        |                         | c.1644-25G>A (p.=) [Gaza B] (SS115492349)          |                                    |                                         |
| <i>SEMA4C</i> | <a href="#">54910</a>  | <a href="#">604462</a>  | -                                                  | -                                  | -                                       |
| <i>UNC50</i>  | <a href="#">25972</a>  | -                       | -                                                  | -                                  | -                                       |
| <i>ZNF2</i>   | <a href="#">7549</a>   | <a href="#">*194500</a> | -                                                  | -                                  | -                                       |

**Table S2. Gaza B family microsatellite genotypes.**

Microsatellite makers genotyped in the Gaza B family. Analysis indicated linkage to 2q11 with a large region of homozygosity overlapping with the published locus on 2q11 in affected individuals. The shared affected haplotype is shown in red.

| Marker ID | Chromosome 2<br>Physical Position<br>(bp) | Alleles |         |              |         |              |              |         |         |
|-----------|-------------------------------------------|---------|---------|--------------|---------|--------------|--------------|---------|---------|
|           |                                           | IV:1    | IV:2    | (Aff)<br>V:1 | V:2     | (Aff)<br>V:3 | (Aff)<br>V:4 | V:5     | V:6     |
| D2S2216   | 88190756                                  | 136 144 | 142 144 | 144 144      | 142 144 | 144 144      | 136 144      | 136 144 | 136 142 |
| D2S2181   | 88457696                                  | 171 187 | 171 179 | 171 171      | 171 179 | 171 171      | 171 187      | 171 187 | 179 187 |
|           | Centromere                                |         |         |              |         |              |              |         |         |
| D2S2154   | 94912173                                  | 275 275 | 275 275 | 275 275      | 275 275 | 275 275      | 275 275      | 275 275 | 275 275 |
| D2S2159   | 95413502                                  | 175 179 | 175 177 | 175 175      | 175 177 | 175 175      | 175 175      | 175 179 | 177 179 |
| D2S113    | 96641271                                  | 209 223 | 209 215 | 209 209      | 209 215 | 209 209      | 209 209      | 209 223 | 215 223 |
| D2S1258   | 97366093                                  | 181 181 | 181 185 | 181 181      | 181 185 | 181 181      | 181 181      | 181 181 | 181 185 |
| D2S2222   | 97665780                                  | 219 221 | 219 221 | 221 221      | 219 221 | 221 221      | 221 221      | 219 221 | 219 219 |
| D2S2175   | 98151116                                  | 125 129 | 123 125 | 125 125      | 123 125 | 125 125      | 125 125      | 125 129 | 123 129 |
| D2S2311   | 98383050                                  | 150 154 | 150 154 | 154 154      | 150 154 | 154 154      | 154 154      | 150 154 | 150 150 |
| D2S2187   | 98471639                                  | 142 152 | 142 154 | 142 142      | 142 154 | 142 142      | 142 142      | 142 152 | 152 154 |
| D2S1309   | 99057069                                  | 74 88   | 74 84   | 74 74        | 74 84   | 74 74        | 74 74        | 74 88   | 84 88   |
| D2S2209   | 100608611                                 | 190 190 | 184 190 | 190 190      | 184 190 | 190 190      | 190 190      | 190 190 | 184 190 |
| D2S2264   | 101785989                                 | 245 245 | 239 245 | 245 245      | 239 245 | 245 245      | 245 245      | 245 245 | 239 245 |
| D2S2972   | 101938400                                 | 228 228 | 228 228 | 228 228      | 228 228 | 228 228      | 228 228      | 228 228 | 228 228 |
| D2S373    | 102507335                                 | 222 230 | 222 232 | 222 222      | 222 232 | 222 222      | 222 222      | 222 230 | 230 232 |
| D2S2356   | 102872869                                 | 128 128 | 122 128 | 128 128      | 122 128 | 128 128      | 128 128      | 128 128 | 122 128 |

**Table S3. Guatemala family microsatellite genotypes.**

Microsatellite markers genotyped in the Guatemalan family. Analysis indicated linkage to 2q11 with the shared affected haplotypes shown in red. There was no family history of consanguinity and genotyping confirmed compound heterozygosity at the disease locus.

| Marker ID | Chromosome 2<br>Physical Location<br>(bp) | Alleles |         |      |      |               |               |               |               |         |      |         |         |       |         |
|-----------|-------------------------------------------|---------|---------|------|------|---------------|---------------|---------------|---------------|---------|------|---------|---------|-------|---------|
|           |                                           | I:1     | I:2     | II:1 | II:2 | (Aff)<br>II:3 | (Aff)<br>II:4 | (Aff)<br>II:5 | (Aff)<br>II:6 | II:7    | II:8 | II:9    | II:10   | II:11 | III:1   |
| D2S113    | 96641271                                  | 222 222 | 206 212 | ? ?  | ? ?  | 212 222       | 212 222       | 212 222       | 212 222       | 206 222 | ? ?  | 212 222 | 206 221 | ? ?   | 220 206 |
| D2S1258   | 97366093                                  | 177 181 | 181 173 | ? ?  | ? ?  | 173 181       | 173 181       | 173 181       | 173 181       | 181 177 | ? ?  | 181 177 | 181 177 | ? ?   | 177 181 |
| D2S2222   | 97665780                                  | 222 218 | 224 224 | ? ?  | ? ?  | 224 218       | 224 218       | 224 218       | 224 218       | 224 218 | ? ?  | 224 222 | 224 222 | ? ?   | 222 224 |
| D2S2175   | 98151116                                  | 125 125 | 121 121 | ? ?  | ? ?  | 121 125       | 121 125       | 121 125       | 121 125       | 121 125 | ? ?  | 121 125 | 121 125 | ? ?   | 123 121 |
| D2S1309   | 99057069                                  | 89 89   | 83 81   | ? ?  | ? ?  | 81 89         | 81 89         | 81 89         | 81 89         | 83 89   | ? ?  | 81 89   | 83 89   | ? ?   | 83 83   |
| D2S2209   | 100608611                                 | 192 196 | 196 186 | ? ?  | ? ?  | 186 196       | 186 196       | 186 196       | 186 196       | 196 196 | ? ?  | 186 192 | 196 192 | ? ?   | 195 195 |
| D2S2264   | 101785989                                 | 229 249 | 249 239 | ? ?  | ? ?  | 239 249       | 239 249       | 239 249       | 239 249       | 249 249 | ? ?  | 239 229 | 249 229 | ? ?   | 247 249 |
| D2S2972   | 101938400                                 | 229 237 | 237 233 | ? ?  | ? ?  | 233 237       | 233 237       | 233 237       | 233 237       | 237 237 | ? ?  | 233 229 | 237 229 | ? ?   | 229 237 |
| D2S373    | 102507335                                 | 222 233 | 231 233 | ? ?  | ? ?  | 233 233       | 233 233       | 233 233       | 233 233       | 231 233 | ? ?  | 233 222 | 231 222 | ? ?   | 222 231 |
| D2S2356   | 102872869                                 | 126 126 | 114 126 | ? ?  | ? ?  | 114 126       | 126 126       | 126 126       | 126 126       | 114 126 | ? ?  | 126 126 | 126 126 | ? ?   | 120 126 |

**Table S4. Iran family microsatellite genotypes.**

Microsatellite markers genotyped in the Iranian family. Haplotype analysis provided support for the existence of a homozygous linked region in affected individuals within the disease locus on 2q11, shown in red.

| Marker ID | Chromosome 2<br>Physical Location<br>(bp) | Alleles |         |               |               |               |         |         |      |              |
|-----------|-------------------------------------------|---------|---------|---------------|---------------|---------------|---------|---------|------|--------------|
|           |                                           | III:1   | III:2   | (Aff)<br>IV:1 | (Aff)<br>IV:2 | (Aff)<br>IV:3 | IV:4    | IV:5    | IV:6 | (Aff)<br>V:1 |
| D2S113    | 96641271                                  | 214 222 | 214 218 | 214 214       | 214 214       | 214 214       | 214 222 | 212 214 | ? ?  | 214 214      |
| D2S2222   | 97665780                                  | ? ?     | 220 222 | 222 222       | 222 222       | 222 222       | 222 226 | 222 224 | ? ?  | 222 222      |
| D2S2175   | 98151116                                  | 123 123 | 121 123 | 123 123       | 123 123       | 123 123       | 123 123 | 123 123 | ? ?  | 123 123      |
| D2S2264   | 101785989                                 | 245 247 | 245 247 | 245 245       | 245 245       | 245 245       | 245 247 | 245 245 | ? ?  | 245 245      |
| D2S2972   | 101938400                                 | 229 229 | 229 237 | 229 229       | 229 229       | 229 229       | 229 229 | 229 237 | ? ?  | 229 229      |
| D2S373    | 102507335                                 | 232 232 | 232 232 | 232 232       | 232 232       | 232 232       | 232 232 | 232 232 | ? ?  | 232 232      |
