# Supplementary material for: Mutations in CNNM4 Cause Jalili Syndrome, Consisting of Autosomal-Recessive Cone-Rod Dystrophy and Amelogenesis Imperfecta
Source: PubMed Central journal article supplement (PMC2668026; doi:10.1016/j.ajhg.2009.01.009), 2009-02-13
Supplement: mmc2.pdf [file mmc2.pdf]

**Table S5. Genotyping by Affymetrix Genome-Wide Human SNP Array 6.0.**

Shown are SNP genotypes in the vicinity of the linked region on chromosome 2. The refined region of homozygosity between RS2628473 and RS1901284 is highlighted in blue. SNPs with one or more “No call” have been deleted for clarity. No significant region of homozygosity was discovered in the Guatemalan or Scottish families which were subsequently found to be compound heterozygotes for mutations in CNNM4. The Iranian family was not subject to SNP array analysis.

| SNP ID     | Position   | Gaza A    | Gaza B   | Turkey   | Kosovo   | Kosovo   |
|------------|------------|-----------|----------|----------|----------|----------|
|            |            | Affected  | Affected | Affected | Affected | Affected |
|            |            | (VIII:10) | (V:4)    | (II:2)   | (II:1)   | (II:2)   |
| RS13383174 | 83,397,510 | AA        | AB       | AA       | AA       | AA       |
| RS6745924  | 83,404,580 | BB        | BB       | AA       | AA       | AA       |
| RS9631052  | 83,420,160 | AA        | AB       | AA       | AA       | AA       |
| RS7563569  | 83,443,860 | AA        | AB       | BB       | BB       | BB       |
| RS1429398  | 83,458,300 | AA        | AA       | AA       | AA       | AA       |
| RS1121554  | 83,461,580 | AA        | AA       | AA       | AA       | AA       |
| RS1035979  | 83,467,540 | BB        | BB       | BB       | BB       | AB       |
| RS17380093 | 83,490,570 | BB        | AB       | BB       | AB       | AB       |
| RS11887003 | 83,510,330 | AA        | AB       | AA       | AA       | AA       |
| RS17023490 | 83,515,780 | AA        | AA       | AA       | AA       | AA       |
| RS7578567  | 83,521,580 | AA        | AA       | AA       | AA       | AA       |
| RS17023511 | 83,524,740 | AA        | AB       | AA       | AA       | AA       |
| RS13428591 | 83,525,880 | AA        | AB       | AA       | AB       | AB       |
| RS17023566 | 83,535,990 | AA        | AA       | AA       | AA       | AA       |
| RS13384567 | 83,536,610 | AA        | AB       | AA       | AA       | AA       |
| RS13384589 | 83,536,660 | BB        | AB       | BB       | BB       | BB       |
| RS6547499  | 83,540,670 | AA        | AB       | AA       | AA       | AA       |
| RS17023589 | 83,543,010 | AA        | AA       | AA       | AA       | AA       |
| RS967016   | 83,548,440 | AB        | BB       | AA       | AB       | AB       |
| RS9309601  | 83,548,580 | AB        | AB       | BB       | BB       | BB       |
| RS17023626 | 83,557,980 | BB        | AB       | BB       | BB       | BB       |
| RS13384894 | 83,564,820 | BB        | AB       | BB       | BB       | BB       |
| RS13392429 | 83,567,150 | AA        | AB       | AA       | AA       | AA       |
| RS12619848 | 83,568,060 | BB        | AB       | BB       | AB       | AB       |
| RS9631074  | 83,594,910 | AA        | AB       | AA       | AA       | AA       |
| RS6706752  | 83,602,990 | BB        | AB       | BB       | AB       | AB       |
| RS1366827  | 83,606,800 | AA        | BB       | AA       | AB       | AB       |
| RS1366828  | 83,606,970 | AA        | AB       | AA       | AB       | AB       |
| RS13015327 | 83,615,580 | AA        | AB       | AA       | AB       | AB       |
| RS1011477  | 83,626,310 | AA        | AB       | AA       | AB       | AB       |
| RS17315158 | 83,632,110 | AA        | AB       | AA       | AA       | AA       |
| RS6740151  | 83,634,350 | AB        | AA       | AB       | AB       | AB       |
| RS17023704 | 83,655,490 | BB        | BB       | BB       | BB       | BB       |
| RS1486837  | 83,659,770 | BB        | AB       | BB       | BB       | BB       |
| RS17023713 | 83,660,860 | BB        | BB       | BB       | BB       | BB       |
| RS6722452  | 83,660,880 | BB        | BB       | BB       | BB       | BB       |
| RS1386306  | 83,662,820 | BB        | AA       | BB       | AA       | AB       |
| RS6747341  | 83,676,540 | AA        | AA       | AA       | AA       | AA       |

|            |            |    |    |    |    |    |
|------------|------------|----|----|----|----|----|
| RS1906128  | 83,696,210 | AA | BB | AA | AB | AB |
| RS10520375 | 83,696,280 | AA | AA | AA | AA | AA |
| RS10173571 | 83,711,460 | AB | AA | AA | AA | AA |
| RS11682212 | 83,722,620 | BB | AA | BB | AB | AB |
| RS11894402 | 83,729,630 | AA | AA | AA | AA | AA |
| RS7590611  | 83,744,920 | AA | BB | AA | AA | AA |
| RS17023794 | 83,760,020 | AA | AB | AA | AA | AA |
| RS1872734  | 83,760,980 | BB | AB | BB | BB | BB |
| RS1868657  | 83,765,660 | BB | AB | BB | BB | BB |
| RS1901396  | 83,771,980 | AA | BB | AA | AA | AA |
| RS896476   | 83,777,300 | AA | BB | AA | AA | AA |
| RS10496299 | 83,783,490 | AA | AB | AA | AA | AA |
| RS12052366 | 83,783,700 | AA | AB | AA | AA | AB |
| RS10195787 | 83,790,250 | AA | AB | AA | AA | AA |
| RS13020687 | 83,797,800 | AA | BB | AA | AA | AA |
| RS2859990  | 83,800,130 | AA | AB | AA | AA | AA |
| RS2198006  | 83,800,320 | AA | AB | AA | AB | AB |
| RS11897350 | 83,802,460 | AA | AB | AA | AB | AB |
| RS12151569 | 83,814,860 | BB | AB | BB | AB | AB |
| RS1450263  | 83,816,510 | AB | BB | BB | BB | AB |
| RS1486834  | 83,817,170 | AA | AB | AA | AB | AB |
| RS4832321  | 83,822,640 | AA | AB | AA | AB | AB |
| RS7576097  | 83,825,590 | AA | AB | AA | AB | AB |
| RS17024065 | 83,832,620 | BB | BB | BB | BB | BB |
| RS2068677  | 83,835,740 | BB | AB | BB | AB | AB |
| RS17024079 | 83,835,860 | AA | AB | AA | AA | AA |
| RS1115900  | 83,841,980 | BB | BB | BB | BB | BB |
| RS2122456  | 83,845,110 | AA | AA | AA | AA | AA |
| RS1450253  | 83,865,920 | BB | BB | BB | BB | BB |
| RS3100102  | 83,867,090 | AA | AA | AA | AA | AA |
| RS4832325  | 83,883,090 | BB | AB | BB | AB | AB |
| RS10169744 | 83,902,100 | AA | AB | AA | AB | AB |
| RS4832333  | 83,908,430 | BB | AB | BB | AB | AB |
| RS10178418 | 83,909,740 | BB | AB | BB | AB | AB |
| RS10202321 | 83,909,830 | BB | AB | BB | AB | AB |
| RS12618752 | 83,917,490 | AA | AA | AA | AA | AA |
| RS4832061  | 83,919,520 | BB | BB | BB | BB | BB |
| RS13423886 | 83,927,820 | AA | AA | AA | AA | AA |
| RS11896453 | 83,928,450 | BB | BB | BB | BB | BB |
| RS6727508  | 83,931,670 | BB | BB | BB | BB | BB |
| RS13409188 | 83,941,220 | AA | AA | AA | AA | AA |
| RS4832348  | 83,941,260 | AA | AA | AA | AA | AA |
| RS12714112 | 83,946,270 | AA | AA | AA | AA | AB |
| RS4443013  | 83,950,990 | BB | BB | BB | BB | BB |
| RS10865470 | 83,959,470 | AA | AA | AA | AA | AA |
| RS10170098 | 83,960,090 | AA | AA | AA | AA | AA |
| RS4550682  | 83,962,620 | AA | AA | AA | AA | AA |
| RS7566318  | 83,969,500 | AA | AA | AA | AA | AA |
| RS4528772  | 83,991,380 | BB | BB | BB | BB | BB |
| RS10865472 | 84,006,230 | AA | AA | AA | AA | AB |
| RS4832352  | 84,008,570 | AA | AA | AA | AA | AA |

|            |            |    |    |    |    |    |
|------------|------------|----|----|----|----|----|
| RS17024248 | 84,009,590 | BB | BB | BB | BB | BB |
| RS1374731  | 84,019,860 | AA | AA | AA | AA | AA |
| RS12328713 | 84,022,390 | AA | AA | AA | AA | AA |
| RS12616175 | 84,036,170 | AA | AA | AA | AA | AA |
| RS2885856  | 84,049,500 | AA | AA | AA | AA | AA |
| RS2885857  | 84,049,580 | BB | BB | BB | BB | BB |
| RS725729   | 84,052,380 | BB | BB | BB | BB | BB |
| RS10189816 | 84,054,220 | BB | BB | BB | BB | BB |
| RS10190107 | 84,054,570 | BB | BB | BB | BB | BB |
| RS12714117 | 84,054,630 | BB | BB | BB | BB | BB |
| RS12162398 | 84,056,640 | AA | AA | AA | AA | AA |
| RS763866   | 84,071,800 | AA | AA | AA | AA | AB |
| RS13401483 | 84,072,680 | BB | BB | BB | BB | BB |
| RS1348954  | 84,073,490 | AA | AA | AA | AA | AA |
| RS17024345 | 84,074,460 | AA | AA | AA | AA | AA |
| RS4832366  | 84,080,590 | AA | AA | AA | AA | AA |
| RS7576982  | 84,084,970 | AA | AA | AA | AA | AA |
| RS11126939 | 84,103,480 | BB | BB | BB | BB | BB |
| RS11126941 | 84,106,920 | BB | BB | BB | BB | BB |
| RS12474795 | 84,112,840 | BB | BB | BB | BB | BB |
| RS1348955  | 84,117,280 | BB | BB | BB | BB | BB |
| RS17024420 | 84,120,550 | AA | AA | AA | AA | AA |
| RS17024458 | 84,134,140 | BB | BB | BB | BB | BB |
| RS13409074 | 84,135,250 | BB | BB | BB | BB | BB |
| RS2100129  | 84,137,560 | AA | AA | AA | AA | AA |
| RS4832371  | 84,138,210 | AA | AA | AA | AA | AA |
| RS17024465 | 84,138,780 | BB | BB | BB | BB | BB |
| RS17388373 | 84,138,880 | AA | BB | AA | BB | BB |
| RS13431095 | 84,141,110 | AA | AA | AA | AA | AA |
| RS1584308  | 84,144,100 | BB | BB | BB | BB | BB |
| RS17024540 | 84,168,930 | AA | AA | AA | AA | AA |
| RS17024543 | 84,169,040 | BB | BB | BB | BB | BB |
| RS1597039  | 84,177,540 | BB | AB | BB | AB | AB |
| RS6705963  | 84,180,580 | AA | AB | AA | AB | AB |
| RS11884424 | 84,196,900 | BB | AB | BB | AB | AB |
| RS1526700  | 84,199,190 | AA | AB | AA | AB | AB |
| RS1918095  | 84,200,750 | AA | AB | AA | AB | AB |
| RS11674417 | 84,202,140 | BB | BB | BB | BB | BB |
| RS7579223  | 84,215,780 | BB | AB | BB | AB | AB |
| RS7579456  | 84,215,970 | AA | AB | AA | AB | AB |
| RS4263122  | 84,216,110 | BB | BB | BB | BB | BB |
| RS1568997  | 84,222,110 | AA | AB | AA | AB | AB |
| RS4453706  | 84,223,690 | AA | AB | AA | AB | AB |
| RS2364236  | 84,225,460 | AA | AA | AA | AB | AB |
| RS11884557 | 84,227,140 | BB | BB | BB | BB | BB |
| RS1358194  | 84,234,960 | AA | AB | AA | AA | AB |
| RS13385328 | 84,239,140 | AA | AA | AA | AA | AA |
| RS17024618 | 84,260,580 | AA | AB | AA | AA | AA |
| RS17024623 | 84,263,750 | AA | AA | AA | AA | AA |
| RS10496308 | 84,273,240 | BB | AA | BB | AB | AB |
| RS11126951 | 84,273,500 | AA | AB | AA | AB | AB |

|            |            |    |    |    |    |    |
|------------|------------|----|----|----|----|----|
| RS6736384  | 84,280,860 | BB | AB | BB | AB | AB |
| RS10180739 | 84,282,330 | BB | AB | BB | AB | AB |
| RS2886029  | 84,285,010 | BB | AB | BB | AB | AB |
| RS10865473 | 84,287,150 | BB | AB | BB | AB | AB |
| RS11126953 | 84,287,260 | BB | AB | BB | AB | AB |
| RS11126954 | 84,287,410 | BB | AB | BB | AB | AB |
| RS6727246  | 84,290,990 | AA | AB | AA | AB | AB |
| RS2364258  | 84,295,340 | AA | AB | AA | AB | AB |
| RS12714122 | 84,297,380 | AA | AB | AA | AB | AB |
| RS6750854  | 84,302,450 | AA | AB | AA | AB | AB |
| RS2364265  | 84,313,510 | BB | AB | BB | AB | AB |
| RS2364266  | 84,313,540 | BB | AB | BB | AB | AB |
| RS4020792  | 84,314,380 | AA | AB | AA | AB | AB |
| RS2364267  | 84,317,740 | BB | AB | BB | AB | AB |
| RS11899552 | 84,323,540 | AA | AA | AA | AA | AA |
| RS7602393  | 84,324,020 | BB | AB | BB | AB | AB |
| RS744513   | 84,324,620 | AA | AB | AA | AB | AB |
| RS12466935 | 84,326,410 | BB | AB | BB | AB | AB |
| RS11126958 | 84,330,450 | AA | AB | AA | AB | AB |
| RS6547544  | 84,331,330 | BB | AB | BB | AB | AB |
| RS6761743  | 84,331,460 | BB | AB | BB | AB | AB |
| RS6547547  | 84,340,240 | BB | AB | BB | AB | AB |
| RS17024780 | 84,340,340 | BB | BB | BB | BB | BB |
| RS882501   | 84,358,060 | AA | AA | AA | AB | AB |
| RS731331   | 84,362,530 | AA | AA | AA | AA | AA |
| RS731330   | 84,362,710 | AA | AB | AA | AB | AB |
| RS1869666  | 84,364,540 | BB | BB | BB | AB | AB |
| RS1031532  | 84,373,180 | AA | AB | AA | AB | AB |
| RS2168224  | 84,378,180 | AA | AA | AA | AB | AB |
| RS2124177  | 84,378,450 | BB | AB | BB | AB | AB |
| RS11686691 | 84,382,260 | BB | AB | BB | AB | AB |
| RS2219161  | 84,387,840 | BB | BB | BB | AB | AB |
| RS2061080  | 84,388,490 | AA | AB | AA | AB | AB |
| RS7572995  | 84,390,470 | BB | BB | BB | BB | BB |
| RS7572915  | 84,390,500 | BB | BB | BB | BB | BB |
| RS17024868 | 84,390,590 | BB | BB | BB | AB | AB |
| RS4832071  | 84,402,200 | AA | AA | AA | AB | AB |
| RS7601141  | 84,402,820 | AA | AA | AA | AB | AB |
| RS1454998  | 84,419,040 | BB | AA | BB | AB | AB |
| RS10211465 | 84,419,700 | AA | AA | AA | AB | AB |
| RS1840406  | 84,429,910 | BB | BB | BB | AB | AB |
| RS1947463  | 84,433,010 | AA | AA | AA | AB | AB |
| RS11890635 | 84,440,550 | AA | AA | AA | AA | AA |
| RS1455004  | 84,442,050 | AA | AA | AA | AB | AB |
| RS10496309 | 84,468,980 | BB | BB | BB | BB | BB |
| RS2085192  | 84,470,010 | BB | BB | BB | BB | BB |
| RS1947465  | 84,471,620 | BB | BB | BB | AB | AB |
| RS12613583 | 84,474,660 | AA | AA | AA | AA | AA |
| RS11686391 | 84,476,670 | BB | AB | BB | BB | BB |
| RS11126962 | 84,491,620 | AA | AA | AA | AA | AA |
| RS17025000 | 84,493,750 | AA | AA | AA | AA | AA |

|            |            |    |    |    |    |    |
|------------|------------|----|----|----|----|----|
| RS13383562 | 84,493,810 | AA | AA | AA | AA | AA |
| RS17757342 | 84,497,120 | AA | BB | BB | BB | BB |
| RS2832     | 84,504,220 | AA | AA | AA | AB | AB |
| RS4831973  | 84,510,950 | AA | AA | AA | AB | AB |
| RS12618709 | 84,515,870 | BB | BB | BB | BB | BB |
| RS17757829 | 84,520,140 | BB | BB | AB | BB | BB |
| RS1599306  | 84,525,990 | AA | AA | AA | AB | AB |
| RS6719880  | 84,526,860 | AA | AA | AA | AB | AB |
| RS13000280 | 84,550,500 | BB | BB | BB | AB | AB |
| RS13006689 | 84,550,950 | BB | AB | BB | BB | BB |
| RS7590348  | 84,553,270 | BB | BB | BB | BB | BB |
| RS12623199 | 84,554,010 | BB | BB | BB | BB | BB |
| RS4832087  | 84,578,180 | AA | AA | AA | AB | AB |
| RS4831979  | 84,578,890 | AA | AB | AA | AB | AB |
| RS12373700 | 84,633,000 | AA | AA | AA | AB | AB |
| RS13034783 | 84,636,260 | AA | AB | AA | AA | AA |
| RS7559623  | 84,639,690 | AA | AA | AA | AB | AB |
| RS17759625 | 84,669,190 | AA | BB | AA | BB | BB |
| RS1460703  | 84,669,260 | AB | BB | BB | BB | BB |
| RS1006244  | 84,669,530 | AA | AB | AA | AA | AA |
| RS7559641  | 84,669,830 | AA | AA | AA | AA | AA |
| RS4020077  | 84,681,510 | AA | AB | AA | AB | AB |
| RS1460710  | 84,684,420 | AA | AB | AA | AB | AB |
| RS1460709  | 84,684,780 | BB | AB | BB | AB | AB |
| RS7570369  | 84,685,280 | BB | AB | BB | AB | AB |
| RS12997105 | 84,687,140 | BB | AB | BB | AB | AB |
| RS7587820  | 84,695,130 | AA | AB | AA | AB | AB |
| RS11889456 | 84,700,190 | BB | AB | BB | AB | AB |
| RS11126970 | 84,705,270 | AA | AB | AA | AB | AB |
| RS11676670 | 84,705,520 | AA | AB | AA | AB | AB |
| RS6726617  | 84,713,400 | BB | AB | BB | AB | AB |
| RS4313996  | 84,716,350 | AA | AB | AA | AB | AB |
| RS7572042  | 84,720,760 | AA | AB | AA | AB | AB |
| RS7593359  | 84,728,470 | AA | AB | AA | AB | AB |
| RS11895477 | 84,752,760 | AA | AB | AA | AA | AA |
| RS1918697  | 84,754,380 | AA | AB | BB | AB | AB |
| RS1918695  | 84,755,720 | AA | BB | BB | AB | AB |
| RS17759986 | 84,756,190 | BB | BB | BB | BB | BB |
| RS17025450 | 84,760,300 | BB | BB | BB | BB | BB |
| RS6749125  | 84,760,880 | AA | AB | BB | AB | AB |
| RS17025484 | 84,769,910 | BB | BB | BB | BB | BB |
| RS1192304  | 84,770,400 | AA | AA | AA | AB | AB |
| RS1192296  | 84,773,550 | BB | BB | BB | AB | AB |
| RS1192285  | 84,779,990 | BB | BB | BB | AB | AB |
| RS1192269  | 84,786,340 | AA | AA | AA | AB | AB |
| RS1192266  | 84,789,710 | BB | BB | BB | AB | AB |
| RS1918693  | 84,792,500 | BB | AB | AA | BB | BB |
| RS17025508 | 84,798,620 | AA | AA | AA | AA | AA |
| RS10199591 | 84,799,580 | AA | AB | AB | AA | AA |
| RS1192333  | 84,805,190 | AA | AB | BB | AB | AB |
| RS1192324  | 84,815,250 | BB | BB | BB | AB | AB |

|            |            |    |    |    |    |    |
|------------|------------|----|----|----|----|----|
| RS10180799 | 84,826,420 | BB | AB | AA | BB | BB |
| RS890615   | 84,831,890 | BB | AB | AA | AB | AB |
| RS17025543 | 84,846,170 | BB | AB | AA | BB | BB |
| RS7606803  | 84,869,020 | BB | BB | BB | BB | BB |
| RS1192395  | 84,878,240 | BB | AB | AA | BB | BB |
| RS1192367  | 84,887,340 | BB | AB | AB | BB | BB |
| RS7573165  | 84,888,240 | BB | BB | BB | BB | BB |
| RS1192366  | 84,888,570 | AA | AB | BB | AB | AB |
| RS11686936 | 84,889,450 | AA | AA | AA | AB | AB |
| RS7584208  | 84,899,980 | AA | AA | AA | AA | AA |
| RS7584703  | 84,900,430 | AA | AA | AA | AA | AA |
| RS17025617 | 84,901,680 | AA | AA | AA | AA | AA |
| RS1627220  | 84,906,970 | AA | AB | BB | AA | AA |
| RS1192277  | 84,909,340 | AA | AB | BB | AA | AA |
| RS7579460  | 84,911,570 | AA | AA | AA | AB | AB |
| RS12472846 | 84,919,140 | AA | AB | BB | AB | AB |
| RS10514646 | 84,922,140 | AA | AA | AA | AA | AA |
| RS10514645 | 84,931,290 | AA | AA | BB | AB | AB |
| RS17025647 | 84,931,950 | BB | BB | BB | BB | BB |
| RS6743110  | 84,932,540 | AA | AA | BB | BB | BB |
| RS735797   | 84,942,930 | AA | AA | AA | AB | AB |
| RS11693789 | 84,955,250 | AA | AA | AA | AB | AB |
| RS1478782  | 84,957,660 | AA | AA | AA | AB | AB |
| RS4375877  | 84,975,820 | AA | AA | AA | AA | AA |
| RS4377349  | 84,975,920 | AA | AA | AA | AA | AA |
| RS6547580  | 84,980,700 | BB | AB | BB | BB | BB |
| RS6547581  | 84,980,780 | BB | AB | BB | BB | BB |
| RS3884258  | 85,038,670 | BB | BB | BB | BB | BB |
| RS3883876  | 85,040,670 | AA | AB | BB | BB | BB |
| RS6714113  | 85,042,660 | AA | AB | BB | BB | BB |
| RS17038088 | 85,044,100 | BB | BB | BB | BB | BB |
| RS17038084 | 85,045,790 | BB | AB | BB | BB | BB |
| RS17025771 | 85,067,630 | BB | BB | BB | BB | BB |
| RS17710619 | 85,093,820 | AA | AA | AA | AB | AB |
| RS17498115 | 85,102,810 | AA | AA | AA | AA | AA |
| RS17025820 | 85,123,950 | BB | BB | BB | BB | BB |
| RS17025827 | 85,128,180 | BB | BB | BB | BB | BB |
| RS12616403 | 85,133,550 | AA | AA | AA | AA | AA |
| RS1882271  | 85,142,080 | BB | BB | BB | BB | BB |
| RS11690856 | 85,145,340 | BB | AB | AA | AA | AA |
| RS10191268 | 85,145,700 | BB | AB | BB | BB | BB |
| RS12623715 | 85,162,020 | AA | AA | AB | AA | AB |
| RS2583569  | 85,175,260 | AA | AA | BB | AB | AB |
| RS7563120  | 85,177,730 | BB | BB | BB | BB | BB |
| RS2583556  | 85,185,200 | AA | AA | AA | AB | AB |
| RS11693890 | 85,185,930 | BB | BB | AA | AB | AB |
| RS11682512 | 85,185,950 | AA | AA | BB | AB | AB |
| RS4832135  | 85,187,490 | AA | AA | AA | AB | AB |
| RS11884056 | 85,193,350 | AA | AB | AA | AA | AA |
| RS10496315 | 85,193,570 | AA | AA | BB | AA | AA |
| RS17025915 | 85,195,340 | BB | BB | BB | BB | BB |

|            |            |    |    |    |    |    |
|------------|------------|----|----|----|----|----|
| RS17025918 | 85,196,200 | BB | BB | AA | BB | BB |
| RS6728374  | 85,212,060 | BB | BB | AA | AB | AB |
| RS1835812  | 85,219,010 | BB | BB | BB | AB | AB |
| RS10520405 | 85,228,700 | AA | AA | AA | AA | AA |
| RS17025940 | 85,228,790 | AA | AA | AA | AA | AA |
| RS2568219  | 85,229,090 | BB | AB | AA | BB | BB |
| RS6754217  | 85,229,180 | AA | AA | AA | AA | AA |
| RS17025951 | 85,234,580 | AA | AA | AA | AA | AA |
| RS17762406 | 85,234,930 | BB | AB | BB | BB | BB |
| RS13402724 | 85,243,950 | AA | AA | AA | AA | AA |
| RS17025984 | 85,247,780 | BB | BB | BB | BB | BB |
| RS11691849 | 85,248,120 | AB | AB | AA | AA | AA |
| RS11682047 | 85,248,620 | AA | AB | BB | AB | AB |
| RS4832145  | 85,254,100 | BB | BB | BB | BB | BB |
| RS17025989 | 85,256,000 | AA | AA | AA | AA | AA |
| RS2568203  | 85,264,450 | AA | AB | BB | AA | AA |
| RS4374376  | 85,274,220 | AA | AA | AA | AA | AA |
| RS10192927 | 85,282,370 | BB | BB | BB | BB | BB |
| RS12619496 | 85,294,910 | BB | BB | BB | BB | BB |
| RS13396934 | 85,297,330 | BB | BB | BB | BB | BB |
| RS6709476  | 85,297,430 | AA | AB | BB | BB | BB |
| RS6715431  | 85,300,540 | AA | AA | AA | AA | AA |
| RS11892343 | 85,304,330 | BB | AB | BB | BB | BB |
| RS10205484 | 85,321,510 | AA | AB | BB | AA | AA |
| RS7598881  | 85,323,500 | BB | BB | BB | BB | BB |
| RS11675205 | 85,323,790 | AB | BB | BB | BB | BB |
| RS17026102 | 85,329,220 | BB | AB | BB | BB | BB |
| RS17763853 | 85,334,220 | BB | AB | AA | AA | AA |
| RS7581133  | 85,334,330 | AA | AB | AA | BB | BB |
| RS17713036 | 85,334,910 | AA | AA | BB | AA | AA |
| RS7584666  | 85,341,960 | BB | AB | BB | AA | AA |
| RS11689667 | 85,344,880 | BB | AB | AA | AA | AA |
| RS6547607  | 85,344,930 | AA | AB | AA | BB | BB |
| RS10201489 | 85,354,920 | BB | BB | BB | AB | AB |
| RS12714137 | 85,355,780 | BB | BB | BB | AB | AB |
| RS12714138 | 85,355,930 | AA | BB | BB | AB | AB |
| RS6747629  | 85,359,070 | BB | BB | BB | AB | AB |
| RS6733190  | 85,359,430 | BB | AA | AA | AA | AA |
| RS6748258  | 85,359,490 | AA | AA | AA | AB | AB |
| RS10165984 | 85,360,100 | BB | BB | BB | AB | AB |
| RS7598047  | 85,363,530 | AA | BB | AA | AA | AA |
| RS7600828  | 85,363,810 | AA | BB | BB | BB | BB |
| RS7574999  | 85,364,480 | BB | BB | BB | AA | AA |
| RS17026157 | 85,365,160 | BB | BB | BB | BB | BB |
| RS17713693 | 85,365,580 | BB | BB | AB | BB | BB |
| RS6719271  | 85,368,220 | BB | BB | BB | BB | BB |
| RS6706073  | 85,371,780 | BB | BB | BB | BB | BB |
| RS4832156  | 85,376,780 | AA | AB | BB | AA | AA |
| RS1053561  | 85,399,560 | BB | AB | AA | AB | AB |
| RS6547611  | 85,402,150 | BB | AB | AA | AB | AB |
| RS6747513  | 85,419,140 | AA | AB | BB | AB | AB |

|            |            |    |    |    |    |    |
|------------|------------|----|----|----|----|----|
| RS17038362 | 85,421,920 | BB | BB | BB | BB | BB |
| RS1969260  | 85,422,320 | BB | AB | AA | AB | AB |
| RS999939   | 85,422,810 | BB | BB | BB | BB | BB |
| RS15413    | 85,422,890 | AA | AA | AA | AA | AA |
| RS6547615  | 85,427,780 | BB | AB | AA | AB | AB |
| RS7340340  | 85,447,620 | BB | AB | AA | BB | AB |
| RS12104980 | 85,449,540 | AA | AA | AA | AA | AA |
| RS6731223  | 85,458,820 | BB | BB | BB | BB | BB |
| RS11680448 | 85,464,550 | AA | AA | AA | AA | AA |
| RS1135604  | 85,468,520 | AA | AB | AA | AA | AA |
| RS17026285 | 85,470,270 | BB | BB | BB | BB | BB |
| RS11682055 | 85,491,830 | AA | AB | BB | AB | AB |
| RS1877954  | 85,507,810 | AA | BB | BB | BB | BB |
| RS17026339 | 85,525,840 | BB | BB | BB | BB | BB |
| RS908307   | 85,527,500 | AA | AA | AA | AA | AA |
| RS10496317 | 85,536,880 | AA | BB | AA | AB | AB |
| RS2121395  | 85,537,080 | BB | AA | BB | AB | AB |
| RS17735501 | 85,538,720 | BB | BB | BB | BB | BB |
| RS17026356 | 85,538,980 | AA | BB | AA | AB | AB |
| RS7571301  | 85,539,250 | BB | AA | BB | BB | BB |
| RS12616455 | 85,550,060 | AA | AB | AA | AA | AA |
| RS960066   | 85,554,430 | AA | AB | AA | AB | AB |
| RS2166529  | 85,595,690 | AA | AB | AA | AA | AA |
| RS2886722  | 85,595,810 | AA | AB | AA | AA | AA |
| RS7579665  | 85,596,130 | BB | AB | BB | AB | AB |
| RS10496316 | 85,600,880 | BB | BB | BB | AB | AB |
| RS17026396 | 85,612,640 | AA | AB | AA | AA | AA |
| RS2028900  | 85,621,250 | AA | AB | AA | AA | AA |
| RS11675092 | 85,621,380 | AA | AA | AA | AA | AA |
| RS2043675  | 85,623,490 | AA | AB | AA | AB | AB |
| RS6723678  | 85,629,660 | AA | AA | AA | AA | AA |
| RS699664   | 85,634,050 | AA | AB | AA | AB | AB |
| RS13429968 | 85,651,180 | BB | BB | BB | AB | AB |
| RS13426038 | 85,656,910 | AA | AA | AA | AB | AB |
| RS6757263  | 85,657,060 | BB | AB | AA | BB | BB |
| RS1010     | 85,662,500 | AA | AB | BB | AA | AA |
| RS7593969  | 85,663,180 | AA | AB | BB | AB | AB |
| RS1561198  | 85,663,500 | BB | AB | AA | BB | BB |
| RS1254900  | 85,669,850 | AA | AA | AA | AA | AA |
| RS1374370  | 85,671,780 | BB | AB | AA | BB | BB |
| RS719023   | 85,672,000 | AA | AA | BB | AA | AA |
| RS6742887  | 85,674,710 | AA | AA | AA | AA | AA |
| RS2232740  | 85,676,330 | AA | AA | AA | AA | AA |
| RS6547629  | 85,713,740 | BB | BB | AA | BB | BB |
| RS7579847  | 85,714,140 | AA | AB | AA | AA | AA |
| RS3821020  | 85,723,430 | BB | BB | BB | BB | BB |
| RS13386893 | 85,730,590 | AA | AA | AA | AA | AA |
| RS7316     | 85,739,520 | AA | AA | AA | AA | AA |
| RS3024811  | 85,743,660 | AA | AB | AA | AA | AA |
| RS2118177  | 85,743,810 | BB | BB | AA | BB | BB |
| RS1130866  | 85,747,250 | AA | AA | BB | AB | AB |



|            |            |    |    |    |    |    |
|------------|------------|----|----|----|----|----|
| RS6547631  | 85,762,540 | AA | AA | BB | AB | AB |
| RS10180445 | 85,779,730 | AA | AB | BB | AB | AB |
| RS10210321 | 85,781,640 | BB | AB | AA | AB | AB |
| RS6759087  | 85,802,300 | AA | AB | BB | AB | AB |
| RS11126997 | 85,802,900 | AA | AA | BB | AB | AB |
| RS9309624  | 85,813,620 | BB | BB | BB | BB | BB |
| RS2176625  | 85,815,360 | AA | AA | AA | AA | AA |
| RS7425090  | 85,815,660 | AA | AA | AA | AA | AA |
| RS6727520  | 85,818,990 | AA | AA | AA | AA | AA |
| RS1437741  | 85,822,090 | AA | AB | BB | AB | AB |
| RS13430978 | 85,824,220 | BB | AB | AA | AB | AB |
| RS13431188 | 85,824,460 | BB | BB | BB | BB | BB |
| RS17026608 | 85,826,140 | AA | AA | AA | AA | AA |
| RS1356623  | 85,826,430 | BB | AB | BB | BB | BB |
| RS1356621  | 85,826,620 | AB | AA | AA | AA | AA |
| RS1465822  | 85,829,900 | AA | AA | AA | AA | AA |
| RS11126998 | 85,832,300 | BB | BB | BB | BB | BB |
| RS4832198  | 85,849,160 | BB | AB | AA | AB | AB |
| RS6746541  | 85,855,140 | BB | AB | AA | AB | AB |
| RS934775   | 85,858,410 | AA | AB | BB | AA | AA |
| RS934776   | 85,858,740 | BB | BB | BB | BB | BB |
| RS2139198  | 85,861,180 | AA | AA | AA | AA | AA |
| RS13429794 | 85,863,870 | AA | AA | AA | AA | AA |
| RS13386681 | 85,866,540 | BB | BB | BB | BB | BB |
| RS13402783 | 85,868,630 | AA | AA | AA | AA | AA |
| RS13428557 | 85,868,800 | AA | AA | AA | AA | AA |
| RS1370543  | 85,870,310 | BB | BB | BB | BB | BB |
| RS6757562  | 85,872,010 | AA | AA | AA | AA | AA |
| RS13388951 | 85,872,080 | AA | AB | BB | AA | AA |
| RS7609084  | 85,873,100 | BB | AB | AA | BB | BB |
| RS4832201  | 85,874,180 | AA | AB | BB | AA | AA |
| RS10180924 | 85,875,430 | BB | AB | BB | AA | AA |
| RS1878901  | 85,876,910 | AA | AB | AA | BB | BB |
| RS11684014 | 85,882,110 | BB | BB | BB | BB | BB |
| RS6738956  | 85,883,550 | AA | AA | BB | AA | AA |
| RS7576320  | 85,889,060 | AA | BB | AA | BB | BB |
| RS13400884 | 85,893,330 | BB | AA | AA | AA | AA |
| RS11679814 | 85,895,190 | AA | AB | BB | BB | BB |
| RS10196236 | 85,914,900 | BB | BB | BB | BB | BB |
| RS4832202  | 85,915,940 | BB | AB | BB | AA | AA |
| RS13420465 | 85,916,550 | AA | AB | BB | BB | BB |
| RS17026666 | 85,927,900 | AA | AA | AA | AA | AA |
| RS10496320 | 85,931,990 | AA | AA | AA | AA | AA |
| RS10496319 | 85,932,730 | BB | BB | BB | BB | BB |
| RS1518990  | 85,932,850 | AA | AA | AA | AA | AA |
| RS4553826  | 85,948,710 | AA | AB | BB | AA | AA |
| RS4832015  | 85,950,320 | AA | AB | BB | AA | AA |
| RS3810821  | 85,950,340 | BB | BB | BB | BB | BB |
| RS6547638  | 85,954,520 | AA | AB | BB | AA | AA |
| RS2030275  | 85,955,410 | AA | AA | AA | AA | AA |
| RS17026728 | 85,955,530 | AA | AA | AA | AA | AA |

|            |            |    |    |    |    |    |
|------------|------------|----|----|----|----|----|
| RS6721125  | 85,958,240 | AA | AB | BB | AA | AA |
| RS12714154 | 85,971,470 | AA | AB | AA | AB | AB |
| RS2438307  | 85,978,810 | AA | AA | AA | AA | AA |
| RS2577777  | 85,987,830 | BB | AB | AA | AB | AB |
| RS2679722  | 85,988,660 | AA | AB | BB | AB | AB |
| RS2679723  | 85,989,120 | BB | BB | BB | BB | BB |
| RS2679724  | 85,989,720 | AA | AA | AA | AA | AA |
| RS2083170  | 85,992,620 | AA | AB | AA | AB | AB |
| RS4292089  | 85,992,690 | AA | AA | AA | AA | AA |
| RS2945825  | 85,993,310 | AA | AB | BB | AB | AB |
| RS7593080  | 85,999,300 | AA | AB | BB | AB | AB |
| RS2164878  | 86,007,370 | BB | AB | BB | AB | AB |
| RS17026756 | 86,007,510 | AA | AB | AA | AB | AB |
| RS6547647  | 86,008,780 | AA | AB | AA | AB | AB |
| RS6710042  | 86,010,260 | BB | BB | BB | BB | BB |
| RS4832226  | 86,010,490 | BB | AB | BB | AB | AB |
| RS6547648  | 86,010,730 | AA | AA | AA | AA | AA |
| RS11691934 | 86,018,950 | AA | AB | BB | AB | AB |
| RS10167259 | 86,019,280 | AA | AB | BB | AB | AB |
| RS2033770  | 86,021,340 | BB | AB | AA | AB | AB |
| RS2366958  | 86,023,500 | AA | BB | BB | BB | BB |
| RS1158729  | 86,026,150 | BB | BB | BB | BB | BB |
| RS2366960  | 86,027,730 | AA | AA | AA | AA | AA |
| RS6714363  | 86,032,480 | BB | AB | BB | AB | AB |
| RS11891625 | 86,035,770 | AA | AA | AA | AB | AB |
| RS10186005 | 86,036,940 | BB | BB | BB | AB | AB |
| RS2099616  | 86,063,680 | AA | AA | AA | AB | AB |
| RS4480982  | 86,068,570 | AA | AA | AA | AB | AB |
| RS4346389  | 86,068,610 | BB | BB | BB | AB | AB |
| RS7599498  | 86,079,890 | AA | BB | AA | AB | AB |
| RS11127012 | 86,109,610 | BB | AB | BB | AB | AB |
| RS7599656  | 86,119,140 | AA | AA | AA | AA | AA |
| RS7572206  | 86,125,740 | BB | BB | BB | BB | BB |
| RS1561328  | 86,126,270 | AA | AB | AA | AA | AA |
| RS10184159 | 86,129,900 | BB | AB | BB | BB | BB |
| RS311581   | 86,136,470 | BB | AA | AA | AA | AA |
| RS311582   | 86,137,800 | BB | AA | AA | AA | AA |
| RS311569   | 86,148,810 | BB | AA | AA | AA | AA |
| RS311572   | 86,150,080 | AA | BB | BB | BB | BB |
| RS2288117  | 86,158,630 | BB | AA | AA | AA | AA |
| RS12328100 | 86,160,640 | BB | AB | BB | BB | BB |
| RS17584578 | 86,161,140 | BB | AB | BB | BB | BB |
| RS725046   | 86,181,700 | AA | AB | BB | BB | BB |
| RS11127016 | 86,190,620 | AA | AA | BB | BB | BB |
| RS1075622  | 86,191,440 | BB | AB | AA | AA | AA |
| RS17026940 | 86,196,300 | AA | AA | AA | AA | AA |
| RS17618119 | 86,196,820 | BB | BB | AA | AB | AB |
| RS2303339  | 86,199,690 | BB | AB | BB | BB | BB |
| RS1019592  | 86,208,220 | AA | AB | BB | BB | BB |
| RS2241437  | 86,214,080 | AA | AA | AA | AA | AA |
| RS2241436  | 86,214,320 | AA | AB | BB | BB | BB |

|            |            |    |    |    |    |    |
|------------|------------|----|----|----|----|----|
| RS2241435  | 86,214,420 | AA | AB | AA | AA | AA |
| RS10179466 | 86,228,580 | AA | AB | AA | AA | AA |
| RS6547660  | 86,236,680 | AA | AB | AA | AA | AA |
| RS7561589  | 86,238,740 | BB | AB | BB | BB | BB |
| RS10191567 | 86,238,910 | AA | BB | BB | BB | BB |
| RS3770066  | 86,245,860 | AA | AB | AA | AA | AA |
| RS1424516  | 86,248,780 | BB | AA | AA | AA | AA |
| RS7609008  | 86,253,390 | BB | AB | BB | BB | BB |
| RS3821017  | 86,257,330 | AA | BB | AA | AA | AA |
| RS17027011 | 86,260,060 | AA | AB | AA | AA | AA |
| RS3770060  | 86,260,400 | AA | AB | AA | AA | AA |
| RS965636   | 86,266,960 | BB | BB | AA | AA | AA |
| RS10175330 | 86,267,620 | AA | AB | AA | AA | AA |
| RS12996308 | 86,273,440 | BB | AB | BB | BB | BB |
| RS11900161 | 86,280,740 | AA | AB | BB | AA | AA |
| RS6547665  | 86,285,140 | BB | AB | AA | BB | BB |
| RS3770059  | 86,289,580 | AA | AB | AA | BB | BB |
| RS17438451 | 86,292,110 | AA | AA | AA | BB | AB |
| RS17027032 | 86,292,580 | AA | AA | AA | AA | AA |
| RS12329034 | 86,298,080 | AA | AB | AA | AA | AA |
| RS7419344  | 86,304,660 | AA | BB | BB | BB | BB |
| RS11127018 | 86,308,420 | AA | AB | BB | BB | BB |
| RS13000103 | 86,309,000 | BB | AB | AA | BB | BB |
| RS2042502  | 86,312,760 | BB | BB | BB | AA | AA |
| RS4832258  | 86,318,030 | AA | BB | AB | BB | BB |
| RS2278105  | 86,320,020 | AA | AB | BB | AA | AA |
| RS13017143 | 86,320,060 | BB | AB | AA | BB | BB |
| RS6714362  | 86,330,100 | BB | AB | AA | BB | BB |
| RS1863053  | 86,330,980 | BB | BB | BB | BB | BB |
| RS4832031  | 86,332,490 | BB | BB | BB | AA | AA |
| RS4832261  | 86,338,010 | BB | BB | BB | AA | AA |
| RS17510512 | 86,338,820 | AA | AA | AA | AA | AA |
| RS17027110 | 86,341,620 | AA | AA | AA | AA | AA |
| RS10204589 | 86,346,740 | BB | AB | BB | AA | AA |
| RS12622200 | 86,352,100 | BB | AB | AA | BB | BB |
| RS10520415 | 86,352,250 | BB | AB | AA | BB | BB |
| RS11127024 | 86,358,960 | AA | AA | AA | BB | BB |
| RS12617962 | 86,366,620 | BB | BB | BB | BB | BB |
| RS17738096 | 86,367,410 | AA | AB | BB | AA | AB |
| RS7587576  | 86,367,540 | BB | BB | BB | BB | BB |
| RS13023154 | 86,370,500 | BB | AB | AA | BB | BB |
| RS10188530 | 86,372,540 | AA | AB | AA | AA | AA |
| RS1863065  | 86,376,950 | AA | AB | BB | BB | BB |
| RS6760222  | 86,379,640 | BB | BB | BB | BB | BB |
| RS13388621 | 86,386,470 | BB | AB | BB | BB | BB |
| RS12478653 | 86,388,900 | BB | AB | AA | BB | BB |
| RS6716825  | 86,391,580 | BB | BB | BB | BB | BB |
| RS6704826  | 86,397,880 | AA | AA | AA | AA | AA |
| RS11680025 | 86,398,850 | AA | AA | AA | BB | BB |
| RS17027144 | 86,399,660 | BB | BB | BB | BB | BB |
| RS7593666  | 86,404,350 | AA | AA | AA | AA | AA |

|            |            |    |    |    |    |    |
|------------|------------|----|----|----|----|----|
| RS11675985 | 86,412,490 | AA | AB | BB | BB | BB |
| RS1863052  | 86,412,870 | AA | AB | BB | AA | AA |
| RS10210162 | 86,414,040 | BB | AB | AA | AA | AA |
| RS6714317  | 86,416,010 | BB | BB | BB | BB | BB |
| RS6718850  | 86,417,360 | BB | AB | AA | AA | AA |
| RS12471787 | 86,420,210 | BB | BB | AA | AA | AA |
| RS7589635  | 86,433,200 | BB | BB | AA | AA | AA |
| RS7590671  | 86,437,140 | AA | AA | AA | AA | AA |
| RS12714182 | 86,437,230 | BB | BB | BB | BB | BB |
| RS13405197 | 86,437,760 | BB | BB | AA | AA | AA |
| RS17027161 | 86,437,980 | AA | AB | AA | AA | AA |
| RS4832278  | 86,442,400 | BB | BB | BB | BB | BB |
| RS12151836 | 86,454,560 | BB | BB | AA | AA | AA |
| RS7557127  | 86,463,210 | BB | BB | BB | BB | BB |
| RS1033288  | 86,465,060 | AA | AB | BB | BB | BB |
| RS6716701  | 86,465,650 | AB | AB | AA | AA | AA |
| RS6547678  | 86,466,690 | AA | AB | AA | AA | AA |
| RS6721311  | 86,466,980 | AA | AB | AA | AA | AA |
| RS7609052  | 86,468,180 | AA | AB | AA | AA | AA |
| RS13420491 | 86,468,600 | BB | BB | AA | AA | AA |
| RS6547685  | 86,479,040 | BB | BB | BB | BB | BB |
| RS1105862  | 86,480,480 | BB | BB | BB | BB | BB |
| RS4832282  | 86,481,170 | BB | BB | AA | AA | AA |
| RS12617075 | 86,483,700 | BB | BB | AA | AA | AA |
| RS1113169  | 86,489,020 | AA | AB | AA | AA | AA |
| RS4832285  | 86,498,180 | BB | BB | BB | BB | BB |
| RS17027257 | 86,507,210 | BB | AB | BB | BB | BB |
| RS10865482 | 86,508,400 | BB | BB | AA | AA | AA |
| RS11127037 | 86,510,410 | BB | AB | BB | BB | BB |
| RS2030259  | 86,537,150 | AA | AA | AA | AA | AA |
| RS10496321 | 86,537,220 | AA | AB | AA | AA | AA |
| RS11127042 | 86,551,710 | AA | AA | AA | AA | AA |
| RS17027280 | 86,586,800 | AA | AA | BB | BB | BB |
| RS4832294  | 86,589,870 | BB | BB | BB | BB | BB |
| RS11127043 | 86,591,830 | BB | BB | AA | AA | AA |
| RS17027287 | 86,609,600 | AA | AA | AA | AA | AA |
| RS1036940  | 86,609,720 | AA | AA | AA | AA | AA |
| RS12987172 | 86,643,100 | AA | AA | BB | BB | BB |
| RS12328637 | 86,677,700 | AA | AA | BB | BB | BB |
| RS10520428 | 86,693,040 | BB | AB | BB | BB | BB |
| RS308907   | 86,695,290 | AA | AA | AA | AA | AA |
| RS10451632 | 86,697,430 | AA | AA | AA | AA | AA |
| RS308901   | 86,700,000 | AA | AA | AA | AA | AA |
| RS308910   | 86,709,370 | AA | AA | BB | BB | BB |
| RS308911   | 86,709,490 | AA | AA | AA | AA | AA |
| RS2044234  | 86,711,490 | AB | BB | BB | BB | BB |
| RS308916   | 86,713,420 | AA | AA | BB | AB | AB |
| RS1370452  | 86,726,100 | AA | AB | AA | AA | AA |
| RS7420475  | 86,726,180 | AA | AA | AA | AA | AA |
| RS4402760  | 86,726,340 | BB | BB | BB | BB | BB |
| RS6547701  | 86,727,890 | AA | AB | AA | AA | AA |

|            |            |    |    |    |    |    |
|------------|------------|----|----|----|----|----|
| RS9808243  | 86,729,060 | AA | AB | AA | AA | AA |
| RS12613610 | 86,751,010 | BB | AB | BB | BB | BB |
| RS10201581 | 86,778,720 | AA | AA | AA | AA | AA |
| RS2612952  | 86,790,940 | AA | AA | AA | AA | AA |
| RS13406312 | 86,823,920 | AA | AA | AA | AA | AA |
| RS4832311  | 86,832,410 | AA | AB | BB | BB | BB |
| RS1878109  | 86,836,380 | AA | AA | BB | BB | BB |
| RS1049457  | 86,856,540 | BB | BB | AA | AA | AA |
| RS938487   | 86,863,000 | AA | AB | AA | AA | AA |
| RS1515950  | 86,874,330 | AA | AA | AA | AA | AA |
| RS7577266  | 86,874,960 | BB | BB | BB | BB | BB |
| RS13023213 | 86,875,460 | AA | AA | AA | AA | AA |
| RS1005834  | 86,877,270 | AA | AB | BB | AB | AB |
| RS12477946 | 86,897,300 | AA | AA | AA | AA | AA |
| RS13001400 | 86,902,220 | BB | BB | BB | BB | BB |
| RS4488661  | 86,906,660 | AA | AA | AA | AA | AA |
| RS6749703  | 86,908,760 | BB | BB | BB | BB | BB |
| RS4240205  | 86,910,320 | AA | AB | BB | AB | AB |
| RS10189173 | 86,924,860 | AA | AA | AA | AA | AA |
| RS6724300  | 86,979,760 | BB | BB | BB | AB | AB |
| RS10203656 | 87,132,390 | BB | AB | AA | BB | BB |
| RS2612908  | 87,270,590 | AA | AB | AA | AA | AA |
| RS1518713  | 87,373,860 | AA | AB | BB | AA | AA |
| RS4971998  | 87,539,110 | AA | BB | BB | AB | AB |
| RS6547739  | 87,732,730 | AA | AB | AA | AB | AB |
| RS1710447  | 87,741,700 | AA | AA | BB | AA | AA |
| RS1441649  | 88,076,340 | AA | AA | AB | AB | AB |
| RS10197574 | 88,077,080 | BB | BB | AA | AA | AA |
| RS12714205 | 88,077,460 | BB | BB | AA | AA | AA |
| RS6735537  | 88,092,100 | AA | AA | AA | AA | AA |
| RS11684204 | 88,118,530 | AA | AA | BB | BB | BB |
| RS6547747  | 88,121,120 | AA | AA | BB | BB | BB |
| RS4972168  | 88,132,000 | BB | BB | AA | AA | AA |
| RS11127085 | 88,143,860 | AA | AA | AA | AA | AA |
| RS2919874  | 88,150,910 | AA | AA | BB | BB | BB |
| RS11682584 | 88,152,410 | AA | AA | AA | AA | AA |
| RS2919878  | 88,152,560 | BB | AB | AA | AA | AA |
| RS13387249 | 88,154,900 | AA | AA | AA | AA | AA |
| RS2099825  | 88,159,880 | BB | AB | AA | BB | BB |
| RS9309643  | 88,160,720 | BB | BB | BB | BB | BB |
| RS2970896  | 88,164,250 | AB | AB | AA | AA | AA |
| RS2919857  | 88,169,050 | BB | BB | AA | BB | BB |
| RS2919854  | 88,170,880 | BB | AA | AA | AA | AA |
| RS2970909  | 88,176,220 | AA | BB | BB | AA | AA |
| RS2970911  | 88,176,940 | AA | BB | BB | AA | AA |
| RS10172567 | 88,178,700 | AA | AA | AA | AA | AA |
| RS2919880  | 88,179,030 | BB | AA | AA | AA | AA |
| RS2970923  | 88,181,120 | BB | AB | AA | AA | AA |
| RS2970920  | 88,187,380 | BB | BB | AA | BB | BB |
| RS10192400 | 88,190,300 | AA | AB | BB | BB | BB |
| RS4972176  | 88,190,480 | AA | AB | AA | BB | BB |

|            |            |    |    |    |    |    |
|------------|------------|----|----|----|----|----|
| RS2919863  | 88,190,600 | AA | AB | AA | BB | BB |
| RS13386552 | 88,197,550 | BB | BB | BB | BB | BB |
| RS894194   | 88,199,660 | AA | AB | AA | AA | AA |
| RS1545224  | 88,204,930 | BB | BB | AA | BB | BB |
| RS2241883  | 88,205,180 | AA | AB | AA | AA | AA |
| RS13400963 | 88,208,060 | BB | BB | BB | BB | BB |
| RS2970924  | 88,214,420 | BB | AB | BB | AA | AA |
| RS7581571  | 88,216,350 | AA | AA | AA | AA | AB |
| RS4386315  | 88,216,940 | AA | AB | AA | BB | AB |
| RS7420937  | 88,218,280 | AA | AA | AA | AA | AA |
| RS4325755  | 88,225,590 | BB | BB | AA | BB | BB |
| RS10168005 | 88,226,930 | AA | AB | AA | BB | BB |
| RS12463835 | 88,227,730 | AA | AB | AA | BB | BB |
| RS10173112 | 88,244,270 | AA | AB | AA | BB | BB |
| RS10185660 | 88,244,350 | BB | BB | BB | BB | BB |
| RS9636487  | 88,246,080 | BB | BB | BB | BB | BB |
| RS11683461 | 88,252,910 | AA | AA | AA | AA | AA |
| RS2139100  | 88,255,490 | BB | AB | BB | AA | AA |
| RS2292868  | 88,256,160 | BB | BB | BB | BB | BB |
| RS12621922 | 88,276,110 | AA | AA | AA | AA | AA |
| RS1878813  | 88,279,390 | BB | BB | BB | AA | AB |
| RS17435433 | 88,290,730 | BB | AB | BB | AA | AA |
| RS6547762  | 88,296,880 | AA | AB | AA | BB | BB |
| RS10175119 | 88,300,920 | BB | BB | BB | BB | BB |
| RS2363731  | 88,302,910 | AA | AB | AA | AA | AA |
| RS7425670  | 88,303,140 | AA | AB | AA | AA | AA |
| RS6756194  | 88,303,240 | AA | AB | AA | BB | BB |
| RS4487093  | 88,304,020 | AA | AB | AA | BB | BB |
| RS10173160 | 88,304,290 | AB | AB | AA | BB | BB |
| RS17037827 | 88,306,050 | BB | BB | BB | BB | BB |
| RS4260241  | 88,307,080 | AA | AA | AA | AA | AA |
| RS4972193  | 88,307,680 | AA | AB | AA | AA | AA |
| RS6755212  | 88,308,260 | BB | BB | BB | BB | BB |
| RS12995491 | 88,308,530 | AA | BB | AA | BB | BB |
| RS11694318 | 88,316,440 | AA | AB | AA | AA | AA |
| RS1914732  | 88,322,430 | AA | BB | BB | AA | AA |
| RS2090562  | 88,330,060 | BB | AB | BB | BB | BB |
| RS10178983 | 88,346,360 | AA | AA | AA | AA | AA |
| RS6729287  | 88,347,250 | BB | AB | BB | BB | BB |
| RS6547770  | 88,349,990 | AA | AB | AA | AA | AA |
| RS6728787  | 88,355,940 | BB | AB | BB | BB | BB |
| RS7592389  | 88,364,700 | AA | AB | AA | AA | AA |
| RS7595764  | 88,371,250 | AA | AA | AA | AA | AA |
| RS6750741  | 88,372,120 | AA | AA | AA | AA | AA |
| RS1258391  | 88,396,340 | BB | BB | BB | BB | BB |
| RS17838451 | 88,398,290 | AA | AB | AA | AA | AA |
| RS1258411  | 88,399,210 | BB | AA | BB | BB | BB |
| RS1258408  | 88,400,610 | BB | BB | BB | BB | BB |
| RS17037727 | 88,410,260 | AA | AA | AA | AA | AA |
| RS1713941  | 88,410,470 | AA | AA | AA | AA | AA |
| RS1258419  | 88,412,290 | AA | AA | BB | BB | BB |

|            |            |    |    |    |    |    |
|------------|------------|----|----|----|----|----|
| RS1258418  | 88,412,380 | BB | BB | AA | AA | AA |
| RS1713932  | 88,415,280 | AA | AA | BB | BB | BB |
| RS1659248  | 88,416,090 | AA | AB | BB | BB | BB |
| RS1258425  | 88,432,340 | BB | BB | AA | AA | AA |
| RS1659258  | 88,440,700 | BB | AB | AA | AA | AA |
| RS7559276  | 88,451,270 | AA | AB | AA | AA | AA |
| RS6726237  | 88,460,930 | AA | BB | AA | AA | AA |
| RS10221815 | 88,479,080 | BB | AA | BB | BB | BB |
| RS10221774 | 88,480,790 | BB | BB | BB | BB | BB |
| RS10221875 | 88,481,280 | AA | AA | AA | AA | AA |
| RS13425454 | 88,491,080 | BB | BB | BB | BB | BB |
| RS6704818  | 88,498,560 | AA | AA | AA | AA | AA |
| RS6749685  | 88,502,260 | BB | BB | BB | BB | BB |
| RS6721576  | 88,519,620 | AA | AA | BB | AA | AA |
| RS6722564  | 88,520,410 | AA | AB | AA | BB | BB |
| RS6737701  | 88,520,450 | BB | BB | AA | BB | BB |
| RS6725764  | 88,520,760 | AA | AB | BB | AA | AA |
| RS10203213 | 88,539,710 | AA | AB | BB | AA | AA |
| RS6739967  | 88,539,890 | AA | AA | AA | AA | AA |
| RS11690974 | 88,563,910 | AA | BB | AA | AA | AA |
| RS11677224 | 88,570,930 | AA | BB | AA | AA | AA |
| RS12621362 | 88,585,000 | BB | BB | BB | BB | BB |
| RS11683161 | 88,589,120 | AA | BB | AA | AA | AA |
| RS11127100 | 88,612,080 | BB | AA | BB | BB | BB |
| RS6738571  | 88,612,220 | AA | BB | AA | AA | AA |
| RS11900268 | 88,624,460 | BB | BB | BB | BB | BB |
| RS12623311 | 88,626,260 | BB | AA | BB | BB | BB |
| RS4444527  | 88,627,740 | BB | BB | BB | BB | BB |
| RS4449134  | 88,628,080 | BB | BB | BB | BB | BB |
| RS6739095  | 88,661,180 | AA | AB | BB | AA | AA |
| RS1913671  | 88,681,000 | BB | AB | AA | BB | BB |
| RS10187483 | 88,684,880 | AA | AA | AA | AA | AA |
| RS867014   | 88,700,820 | AA | AA | AA | AA | AA |
| RS11684404 | 88,705,740 | AA | AB | BB | AA | AA |
| RS2364564  | 88,712,580 | AA | AB | BB | AA | AA |
| RS2365106  | 88,729,220 | BB | AB | AA | BB | BB |
| RS13426600 | 88,731,040 | BB | BB | BB | BB | BB |
| RS17037607 | 88,737,230 | BB | BB | BB | BB | BB |
| RS2365107  | 88,754,620 | AA | AA | AA | AA | AA |
| RS13405965 | 88,754,870 | AA | AA | AA | AA | AA |
| RS7421753  | 88,757,640 | AA | AA | AA | AA | AA |
| RS2176053  | 88,758,110 | BB | BB | BB | BB | BB |
| RS13411467 | 88,758,220 | BB | BB | BB | BB | BB |
| RS6747173  | 88,767,360 | AA | AA | AA | AA | AA |
| RS6718735  | 88,767,490 | AA | AA | AA | AA | AA |
| RS17037578 | 88,771,380 | BB | BB | BB | BB | BB |
| RS17838439 | 88,788,400 | AA | AA | AA | AA | AA |
| RS6742845  | 88,796,280 | BB | BB | BB | BB | BB |
| RS7596685  | 88,807,890 | AB | AA | AA | AA | AA |
| RS17037560 | 88,817,800 | AA | AA | AA | AA | AA |
| RS17037556 | 88,820,910 | AA | AA | AA | AA | AA |

|            |            |    |    |    |    |    |
|------------|------------|----|----|----|----|----|
| RS4972012  | 88,826,700 | BB | BB | BB | BB | BB |
| RS7572313  | 88,861,510 | BB | BB | BB | BB | BB |
| RS2848122  | 88,888,300 | BB | AB | BB | BB | BB |
| RS2628474  | 88,890,860 | BB | AB | BB | BB | BB |
| RS2628473  | 88,890,890 | AA | AB | AA | AA | AA |
| RS6547793  | 88,897,510 | AA | AA | AA | AA | AA |
| RS1809526  | 88,906,600 | BB | BB | BB | BB | BB |
| RS17838437 | 88,911,120 | AA | AA | AA | AA | AA |
| RS4972036  | 89,395,620 | AA | AA | AA | AA | AA |
| RS4972121  | 89,400,110 | AA | BB | AA | AA | AA |
| RS11127124 | 89,401,950 | BB | AA | BB | BB | BB |
| RS4101813  | 89,402,220 | BB | BB | BB | BB | BB |
| RS2195078  | 89,682,170 | BB | BB | BB | AA | AA |
| RS17704088 | 89,682,550 | BB | BB | BB | BB | BB |
| RS2847840  | 89,714,800 | AA | BB | BB | BB | BB |
| RS859750   | 89,753,410 | AA | BB | BB | BB | BB |
| RS842160   | 89,879,380 | AA | AA | AA | AA | AA |
| RS4005764  | 90,982,620 | AA | AA | AA | AA | AA |
| RS1901291  | 91,091,700 | BB | BB | BB | BB | BB |
| RS9753235  | 91,159,270 | AA | AA | AA | AA | AA |
| RS232162   | 91,177,840 | AA | AA | AA | AA | AA |
| RS10204030 | 94,735,980 | BB | AA | AA | BB | BB |
| RS12717791 | 94,784,020 | AA | BB | BB | AA | AA |
| RS1809636  | 94,785,420 | BB | BB | BB | AA | AA |
| RS13424824 | 94,917,420 | BB | BB | BB | BB | BB |
| RS7587312  | 94,938,730 | BB | BB | BB | AA | AA |
| RS10210891 | 94,944,590 | BB | BB | BB | AA | AA |
| RS6710440  | 94,956,590 | BB | BB | BB | BB | BB |
| RS7604922  | 95,039,200 | BB | BB | BB | BB | BB |
| RS4241315  | 95,050,830 | AA | AA | AA | AA | AA |
| RS2320619  | 95,098,350 | AA | AA | AA | AA | AA |
| RS4854244  | 95,101,410 | AA | AA | AA | AA | AA |
| RS3112996  | 95,176,100 | AA | AA | AA | AA | AA |
| RS2320625  | 95,226,460 | BB | BB | BB | BB | BB |
| RS13385838 | 95,231,980 | BB | BB | BB | BB | BB |
| RS7589426  | 95,266,900 | AA | AA | AA | AA | AA |
| RS7563350  | 95,294,940 | BB | BB | BB | BB | BB |
| RS1808455  | 95,329,020 | BB | BB | BB | BB | BB |
| RS6715813  | 95,334,100 | AA | AA | AA | AA | AA |
| RS3755523  | 95,338,540 | AA | AA | AA | AA | AA |
| RS889851   | 95,344,060 | BB | BB | BB | BB | BB |
| RS2113417  | 95,363,580 | BB | BB | BB | BB | BB |
| RS9678800  | 95,373,050 | BB | BB | BB | BB | BB |
| RS3772031  | 95,378,620 | BB | BB | BB | BB | BB |
| RS950320   | 95,392,890 | BB | BB | BB | BB | BB |
| RS12996789 | 95,424,970 | AA | AA | AA | AA | AA |
| RS2320170  | 95,603,500 | BB | BB | BB | BB | BB |
| RS10176771 | 95,697,520 | BB | BB | BB | BB | BB |
| RS11676901 | 95,734,300 | AA | AA | AA | AA | AA |
| RS17119922 | 95,743,980 | AA | AA | AA | AA | AA |
| RS1989620  | 95,749,460 | AA | AA | AA | AA | AA |



|            |            |    |    |    |    |    |
|------------|------------|----|----|----|----|----|
| RS4907276  | 95,754,830 | BB | BB | BB | BB | BB |
| RS4907280  | 95,765,860 | AA | AA | AA | AA | AA |
| RS1808357  | 95,785,150 | BB | AA | BB | AA | AA |
| RS1813381  | 95,786,660 | BB | BB | BB | BB | BB |
| RS1917890  | 96,035,730 | AA | AA | AA | AA | AA |
| RS2579516  | 96,048,600 | AA | BB | BB | BB | BB |
| RS2579551  | 96,102,310 | BB | AA | BB | AA | AA |
| RS1168965  | 96,151,620 | BB | BB | BB | BB | BB |
| RS1168968  | 96,189,090 | AA | AA | AA | AA | AA |
| RS4907301  | 96,200,240 | AA | AA | AA | BB | BB |
| RS3770239  | 96,281,970 | AA | AA | AA | AA | AA |
| RS1044594  | 96,301,020 | BB | BB | AA | BB | BB |
| RS17479466 | 96,326,580 | AA | AA | BB | AA | AA |
| RS772178   | 96,327,410 | BB | BB | BB | BB | BB |
| RS17119410 | 96,328,220 | AA | AA | AA | AA | AA |
| RS772173   | 96,364,120 | BB | AA | AA | BB | BB |
| RS3731935  | 96,383,780 | BB | BB | AA | BB | BB |
| RS687950   | 96,433,340 | BB | AA | AA | BB | BB |
| RS584811   | 96,433,610 | BB | AA | BB | BB | BB |
| RS12614696 | 96,482,690 | AA | BB | AA | AA | AA |
| RS6576972  | 96,516,180 | AA | BB | BB | BB | BB |
| RS2118836  | 96,526,700 | AA | AA | BB | BB | BB |
| RS2279049  | 96,526,900 | AA | AA | AA | AA | AA |
| RS1866444  | 96,535,860 | BB | BB | BB | BB | BB |
| RS2579503  | 96,540,360 | BB | BB | BB | BB | BB |
| RS4907241  | 96,605,660 | BB | BB | AA | AA | AA |
| RS12469420 | 96,607,030 | BB | BB | AA | AA | AA |
| RS2314109  | 96,607,260 | AA | BB | BB | BB | BB |
| RS7604736  | 96,607,890 | AA | BB | AA | AA | AA |
| RS17119533 | 96,645,140 | AA | AA | AA | AA | AA |
| RS2280355  | 96,730,030 | AA | AA | AA | AA | AA |
| RS2280356  | 96,730,050 | BB | BB | AA | BB | BB |
| RS6746896  | 96,774,670 | BB | BB | BB | AA | AA |
| RS2678381  | 96,804,990 | AA | BB | BB | BB | BB |
| RS7608661  | 96,823,650 | AA | AA | BB | BB | BB |
| RS7580942  | 96,832,000 | AA | AA | BB | AA | AA |
| RS1878656  | 96,842,070 | AA | AA | AA | AA | AA |
| RS17119598 | 96,850,040 | BB | BB | AA | BB | BB |
| RS7594727  | 96,853,600 | BB | BB | AA | BB | BB |
| RS9948     | 96,864,530 | BB | BB | AA | BB | BB |
| RS7587149  | 96,866,530 | BB | BB | BB | BB | BB |
| RS7566053  | 96,893,120 | AA | AA | AA | AA | AA |
| RS17119643 | 96,917,020 | BB | BB | BB | BB | BB |
| RS12613171 | 96,917,470 | AA | BB | AA | AA | AA |
| RS4907206  | 96,924,640 | BB | AA | BB | BB | BB |
| RS10182965 | 96,926,280 | AA | BB | AA | AA | AA |
| RS11676858 | 96,961,300 | AA | AA | AA | BB | BB |
| RS13403225 | 96,964,550 | BB | BB | BB | AA | AA |
| RS7593754  | 96,971,270 | AA | AA | BB | AA | AA |
| RS6707255  | 96,975,940 | BB | BB | BB | BB | BB |
| RS1623881  | 96,977,470 | BB | AA | BB | BB | BB |

|            |            |    |    |    |    |    |
|------------|------------|----|----|----|----|----|
| RS1257022  | 96,978,660 | BB | BB | BB | AA | AA |
| RS1730127  | 96,986,140 | BB | BB | AA | AA | AA |
| RS4586672  | 96,991,960 | BB | AA | BB | BB | BB |
| RS1796032  | 96,992,260 | BB | AA | BB | BB | BB |
| RS12612567 | 96,992,390 | AA | AA | AA | AA | AA |
| RS1257007  | 96,999,040 | BB | BB | BB | AA | AA |
| RS1257027  | 97,019,610 | AA | BB | AA | AA | AA |
| RS1257026  | 97,019,690 | AA | AA | AA | BB | BB |
| RS17636359 | 97,024,340 | BB | BB | BB | BB | BB |
| RS1256999  | 97,043,660 | BB | BB | BB | AA | AA |
| RS1256995  | 97,047,170 | BB | BB | BB | BB | BB |
| RS1256987  | 97,058,280 | BB | BB | BB | AA | AA |
| RS1148600  | 97,067,010 | BB | BB | BB | AA | AA |
| RS1257006  | 97,072,340 | BB | BB | BB | AA | AA |
| RS1257089  | 97,117,310 | BB | BB | BB | AA | AA |
| RS1257084  | 97,121,230 | BB | BB | BB | AA | AA |
| RS1257101  | 97,122,680 | BB | BB | BB | AA | AA |
| RS1257097  | 97,128,180 | AA | AA | AA | BB | BB |
| RS11895531 | 97,129,290 | AA | AA | AA | AA | AA |
| RS7582819  | 97,237,050 | AA | AA | AA | AA | AA |
| RS4264593  | 97,379,950 | BB | AA | BB | AA | AA |
| RS10199493 | 97,385,000 | AA | AA | AA | AA | AA |
| RS6707273  | 97,386,660 | AA | AA | AA | AA | AA |
| RS3906948  | 97,591,870 | BB | AA | AA | BB | BB |
| RS1375436  | 97,637,310 | BB | BB | AA | AA | AA |
| RS1042705  | 97,640,960 | BB | BB | AA | AA | AA |
| RS2053824  | 97,648,060 | BB | AA | AA | AA | AA |
| RS11123849 | 97,652,660 | AA | BB | BB | BB | BB |
| RS10496323 | 97,656,270 | BB | BB | BB | AA | AA |
| RS17028568 | 97,672,230 | BB | BB | BB | BB | BB |
| RS11893601 | 97,681,340 | BB | AA | AA | AA | AA |
| RS11680855 | 97,684,120 | BB | BB | BB | AA | AA |
| RS11894651 | 97,684,200 | AA | BB | BB | BB | BB |
| RS2290127  | 97,685,460 | AA | AA | AA | AA | AA |
| RS7425883  | 97,697,950 | BB | BB | BB | AA | AA |
| RS6711959  | 97,705,660 | AA | AA | BB | AA | AA |
| RS13033383 | 97,705,940 | AA | AA | AA | AA | AA |
| RS895437   | 97,716,780 | BB | BB | BB | BB | BB |
| RS1466020  | 97,731,680 | BB | BB | BB | BB | BB |
| RS17021963 | 97,734,100 | BB | BB | BB | BB | BB |
| RS930607   | 97,737,890 | BB | BB | BB | BB | BB |
| RS6543088  | 97,738,710 | BB | AA | AA | BB | BB |
| RS6875     | 97,739,410 | BB | AA | AA | BB | BB |
| RS5865     | 97,739,440 | AA | BB | BB | AA | AA |
| RS2305142  | 97,742,150 | BB | AA | BB | BB | BB |
| RS6760008  | 97,744,100 | AA | BB | BB | AA | AA |
| RS3749081  | 97,749,420 | AA | AA | AA | AA | AA |
| RS6738389  | 97,753,160 | AA | AA | AA | AA | AA |
| RS6721323  | 97,753,610 | AA | BB | AA | AA | AA |
| RS3821053  | 97,758,320 | BB | AA | BB | BB | BB |
| RS17022289 | 97,769,940 | AA | AA | AA | AA | AA |

|            |            |    |    |    |    |    |
|------------|------------|----|----|----|----|----|
| RS17022373 | 97,773,600 | BB | BB | BB | BB | BB |
| RS17489454 | 97,773,780 | AA | AA | AA | AA | AA |
| RS2293679  | 97,779,500 | AA | BB | AA | AA | AA |
| RS10188713 | 97,782,560 | AA | BB | AA | AA | AA |
| RS7558931  | 97,805,260 | BB | BB | BB | BB | BB |
| RS7576509  | 97,815,170 | BB | BB | BB | BB | BB |
| RS17424787 | 97,815,620 | AA | AA | AA | AA | AA |
| RS11690687 | 97,828,260 | AA | BB | AA | AA | AA |
| RS10520549 | 97,866,240 | AA | AA | AA | AA | AA |
| RS13008503 | 97,869,650 | BB | AA | BB | BB | BB |
| RS10191101 | 97,900,500 | BB | AA | AA | BB | BB |
| RS1922280  | 97,904,540 | AA | AA | AA | AA | AA |
| RS1503202  | 97,915,290 | AA | BB | AA | AA | AA |
| RS11886417 | 97,941,960 | AA | BB | BB | AA | AA |
| RS7598116  | 97,942,320 | BB | BB | BB | BB | BB |
| RS9308873  | 97,994,020 | BB | BB | BB | BB | BB |
| RS17025744 | 98,002,560 | AA | BB | AA | AA | AA |
| RS17025778 | 98,003,940 | AA | BB | AA | AA | AA |
| RS10460482 | 98,010,610 | AA | BB | BB | BB | BB |
| RS7574926  | 98,022,420 | BB | AA | BB | BB | BB |
| RS4499469  | 98,062,380 | BB | BB | BB | BB | BB |
| RS2034547  | 98,068,460 | BB | BB | BB | BB | BB |
| RS2122753  | 98,083,530 | BB | BB | BB | BB | BB |
| RS6725198  | 98,085,500 | BB | BB | BB | BB | BB |
| RS10204649 | 98,098,370 | AA | AA | AA | BB | BB |
| RS6733649  | 98,123,340 | BB | BB | BB | AA | AA |
| RS13033420 | 98,124,750 | AA | BB | AA | BB | BB |
| RS7598069  | 98,127,820 | BB | AA | BB | BB | BB |
| RS17426403 | 98,129,590 | BB | BB | BB | BB | BB |
| RS13424156 | 98,129,720 | BB | BB | BB | BB | BB |
| RS6744080  | 98,131,070 | AA | BB | AA | AA | AA |
| RS6543330  | 98,139,940 | BB | BB | BB | BB | BB |
| RS17492354 | 98,143,290 | AA | BB | BB | AA | AA |
| RS13399675 | 98,155,780 | AA | AA | AA | AA | AA |
| RS4851884  | 98,162,220 | AA | BB | BB | BB | BB |
| RS17028309 | 98,166,320 | AA | AA | AA | AA | AA |
| RS1466156  | 98,170,740 | AA | AA | AA | AA | AA |
| RS2122755  | 98,174,180 | BB | BB | BB | BB | BB |
| RS4851915  | 98,175,060 | BB | BB | BB | BB | BB |
| RS7579916  | 98,177,500 | BB | BB | BB | BB | BB |
| RS10187244 | 98,182,440 | BB | AA | AA | AA | AA |
| RS17028800 | 98,190,610 | BB | BB | BB | BB | BB |
| RS4132466  | 98,202,390 | AA | AA | AA | AA | AA |
| RS4632400  | 98,205,640 | BB | AA | AA | AA | AA |
| RS13430738 | 98,205,800 | AA | AA | AA | AA | AA |
| RS12712252 | 98,212,840 | AA | AA | AA | AA | AA |
| RS11900430 | 98,213,390 | AA | AA | AA | AA | AA |
| RS6543419  | 98,220,820 | AA | AA | AA | AA | AA |
| RS12470615 | 98,224,740 | BB | AA | AA | AA | AA |
| RS10176437 | 98,254,820 | BB | BB | BB | BB | BB |
| RS4851957  | 98,256,390 | BB | BB | BB | BB | BB |

|            |            |    |    |    |    |    |
|------------|------------|----|----|----|----|----|
| RS17493153 | 98,257,530 | AA | AA | AA | AA | AA |
| RS7606070  | 98,264,470 | AA | BB | BB | BB | BB |
| RS17493655 | 98,264,660 | AA | BB | BB | BB | BB |
| RS6731704  | 98,283,000 | AA | AA | AA | AA | AA |
| RS10176056 | 98,284,580 | BB | BB | BB | BB | BB |
| RS3731659  | 98,288,260 | AA | AA | AA | AA | AA |
| RS11124167 | 98,298,160 | AA | AA | AA | AA | AA |
| RS10198592 | 98,302,410 | BB | BB | BB | BB | BB |
| RS7571110  | 98,315,910 | AA | BB | BB | AA | AA |
| RS13394706 | 98,319,830 | AA | AA | AA | AA | AA |
| RS11123677 | 98,355,500 | AA | BB | AA | BB | BB |
| RS10865015 | 98,355,640 | AA | AA | BB | AA | AA |
| RS3769755  | 98,355,850 | BB | BB | BB | BB | BB |
| RS3769754  | 98,356,130 | AA | BB | AA | BB | BB |
| RS937725   | 98,360,850 | BB | BB | BB | BB | BB |
| RS4146045  | 98,361,070 | AA | AA | AA | AA | AA |
| RS3769745  | 98,367,830 | AA | AA | AA | AA | AA |
| RS6743554  | 98,372,030 | BB | AA | BB | BB | BB |
| RS2271041  | 98,374,780 | BB | BB | BB | BB | BB |
| RS17030716 | 98,375,610 | AA | AA | AA | AA | AA |
| RS10184555 | 98,378,690 | AA | AA | AA | AA | AA |
| RS17031139 | 98,402,960 | BB | BB | BB | BB | BB |
| RS11884501 | 98,430,180 | BB | BB | BB | BB | BB |
| RS3769740  | 98,435,640 | BB | BB | BB | BB | BB |
| RS17031905 | 98,437,340 | AA | AA | AA | AA | AA |
| RS17444095 | 98,442,250 | AA | AA | AA | AA | AA |
| RS3769739  | 98,443,460 | BB | BB | BB | BB | BB |
| RS17032120 | 98,449,370 | BB | BB | BB | BB | BB |
| RS12617721 | 98,450,320 | BB | BB | BB | BB | BB |
| RS11901568 | 98,495,060 | BB | BB | BB | BB | BB |
| RS6753380  | 98,495,470 | AA | AA | AA | AA | AA |
| RS17504774 | 98,502,060 | BB | BB | BB | BB | BB |
| RS2278214  | 98,502,170 | BB | BB | BB | BB | BB |
| RS17504837 | 98,502,560 | BB | BB | BB | BB | BB |
| RS17033136 | 98,515,840 | BB | BB | BB | BB | BB |
| RS2278210  | 98,516,630 | AA | AA | AA | AA | AA |
| RS3769714  | 98,517,230 | BB | BB | BB | AA | AA |
| RS7559530  | 98,541,340 | AA | AA | AA | AA | AA |
| RS10201079 | 98,559,080 | AA | AA | AA | BB | BB |
| RS17033813 | 98,562,910 | BB | BB | BB | BB | BB |
| RS3754875  | 98,569,180 | AA | AA | AA | AA | AA |
| RS6736755  | 98,570,860 | BB | BB | BB | BB | BB |
| RS6542833  | 98,574,640 | BB | BB | BB | AA | AA |
| RS4851145  | 98,589,340 | BB | BB | BB | BB | BB |
| RS3754872  | 98,590,360 | AA | AA | AA | AA | AA |
| RS12618769 | 98,606,360 | BB | BB | BB | BB | BB |
| RS17513621 | 98,612,990 | AA | AA | AA | AA | AA |
| RS13021375 | 98,620,460 | AA | AA | AA | AA | AA |
| RS17021689 | 98,622,340 | BB | BB | BB | BB | BB |
| RS3754870  | 98,638,490 | AA | AA | AA | AA | AA |
| RS17448420 | 98,664,310 | AA | AA | AA | AA | AA |

|            |            |    |    |    |    |    |
|------------|------------|----|----|----|----|----|
| RS2309434  | 98,672,940 | AA | AA | AA | AA | AA |
| RS882164   | 98,684,120 | AA | AA | AA | AA | AA |
| RS13425789 | 98,688,160 | AA | AA | AA | AA | AA |
| RS11123747 | 98,695,190 | AA | BB | BB | BB | BB |
| RS4851150  | 98,705,550 | BB | AA | AA | AA | AA |
| RS10496330 | 98,706,560 | BB | AA | BB | BB | BB |
| RS17021908 | 98,728,620 | AA | AA | AA | AA | AA |
| RS6706340  | 98,736,280 | AA | AA | BB | BB | BB |
| RS6756691  | 98,742,230 | AA | AA | AA | AA | AA |
| RS7573844  | 98,750,460 | BB | AA | AA | AA | AA |
| RS925886   | 98,751,460 | AA | AA | AA | AA | AA |
| RS35979410 | 98,770,900 | BB | BB | BB | BB | BB |
| RS1540785  | 98,798,240 | BB | BB | BB | BB | BB |
| RS2203432  | 98,801,190 | BB | BB | AA | AA | AA |
| RS6733135  | 98,810,770 | AA | BB | BB | BB | BB |
| RS12622681 | 98,828,540 | BB | BB | AA | BB | BB |
| RS11900176 | 98,829,970 | BB | AA | BB | BB | BB |
| RS981602   | 98,830,700 | BB | BB | AA | AA | AA |
| RS6542839  | 98,830,960 | AA | AA | BB | BB | BB |
| RS12616866 | 98,831,100 | AA | AA | AA | AA | AA |
| RS6757098  | 98,837,830 | BB | BB | AA | AA | AA |
| RS4851165  | 98,851,860 | AA | AA | AA | AA | AA |
| RS868921   | 98,858,200 | AA | AA | AA | AA | AA |
| RS4851168  | 98,863,190 | BB | BB | BB | BB | BB |
| RS17022036 | 98,863,360 | BB | BB | BB | BB | BB |
| RS17022040 | 98,866,900 | BB | BB | BB | BB | BB |
| RS17022042 | 98,867,140 | BB | BB | BB | BB | BB |
| RS12614153 | 98,868,920 | AA | AA | AA | AA | AA |
| RS4851170  | 98,870,750 | AA | AA | BB | BB | BB |
| RS17022046 | 98,875,950 | BB | BB | BB | BB | BB |
| RS925887   | 98,881,100 | AA | AA | BB | BB | BB |
| RS6731293  | 98,889,820 | AA | AA | AA | AA | AA |
| RS17022066 | 98,897,360 | AA | AA | AA | AA | AA |
| RS6542843  | 98,900,160 | BB | BB | AA | AA | AA |
| RS6724477  | 98,903,500 | AA | AA | BB | BB | BB |
| RS6732579  | 98,926,670 | BB | AA | AA | AA | AA |
| RS7579984  | 98,929,730 | BB | BB | BB | BB | BB |
| RS1453564  | 98,930,860 | BB | BB | AA | AA | AA |
| RS2309519  | 98,936,820 | BB | BB | BB | BB | BB |
| RS2309520  | 98,936,910 | AA | AA | BB | BB | BB |
| RS6542847  | 98,939,900 | BB | BB | AA | BB | BB |
| RS988825   | 98,942,140 | BB | BB | BB | BB | BB |
| RS6740054  | 98,943,060 | BB | BB | AA | AA | AA |
| RS12612688 | 98,979,520 | BB | BB | AA | AA | AA |
| RS4850895  | 99,010,900 | AA | AA | AA | AA | AA |
| RS12620997 | 99,063,240 | AA | AA | AA | AA | AA |
| RS1563107  | 99,067,710 | AA | AA | BB | BB | BB |
| RS12613624 | 99,099,180 | BB | BB | AA | AA | AA |
| RS1133977  | 99,108,420 | BB | BB | AA | AA | AA |
| RS11695379 | 99,108,590 | AA | AA | BB | BB | BB |
| RS13428547 | 99,110,690 | BB | BB | BB | BB | BB |

|            |            |    |    |    |    |    |
|------------|------------|----|----|----|----|----|
| RS4851187  | 99,112,290 | BB | BB | AA | AA | AA |
| RS3791211  | 99,145,170 | AA | AA | AA | AA | AA |
| RS2309581  | 99,150,720 | BB | BB | AA | AA | AA |
| RS2309582  | 99,150,740 | BB | BB | BB | BB | BB |
| RS11689265 | 99,165,700 | AA | AA | BB | BB | BB |
| RS17022330 | 99,169,100 | AA | AA | AA | AA | AA |
| RS10865030 | 99,171,070 | AA | BB | BB | BB | BB |
| RS7586635  | 99,194,170 | BB | AA | AA | AA | AA |
| RS7603462  | 99,214,320 | AA | BB | BB | BB | BB |
| RS7579999  | 99,224,100 | AA | BB | BB | BB | BB |
| RS995617   | 99,224,340 | BB | BB | BB | BB | BB |
| RS4851196  | 99,224,990 | BB | AA | BB | BB | BB |
| RS17022433 | 99,240,090 | AA | BB | AA | BB | BB |
| RS4850899  | 99,243,900 | AA | AA | BB | AA | AA |
| RS1922625  | 99,280,430 | BB | AA | AA | AA | AA |
| RS4851201  | 99,296,250 | BB | AA | AA | AA | AA |
| RS12623620 | 99,342,300 | BB | BB | BB | BB | BB |
| RS2309617  | 99,342,720 | BB | AA | BB | AA | AA |
| RS3087388  | 99,385,990 | AA | AA | AA | AA | AA |
| RS13402784 | 99,398,880 | BB | AA | AA | AA | AA |
| RS7602535  | 99,406,100 | AA | AA | AA | AA | AA |
| RS9941566  | 99,406,330 | BB | BB | BB | BB | BB |
| RS3792151  | 99,408,080 | BB | AA | AA | AA | AA |
| RS28382892 | 99,419,730 | BB | BB | BB | BB | BB |
| RS10186223 | 99,424,860 | BB | AA | AA | AA | AA |
| RS3792138  | 99,427,430 | BB | BB | BB | BB | BB |
| RS7594838  | 99,433,980 | BB | BB | AA | BB | BB |
| RS7567674  | 99,434,010 | AA | AA | BB | AA | AA |
| RS7585019  | 99,443,760 | BB | AA | BB | AA | AA |
| RS6542882  | 99,464,050 | AA | AA | BB | AA | AA |
| RS6714244  | 99,471,740 | BB | BB | AA | BB | BB |
| RS6715321  | 99,475,430 | BB | AA | BB | AA | AA |
| RS11887574 | 99,475,680 | AA | AA | BB | AA | AA |
| RS13384883 | 99,489,020 | BB | BB | AA | BB | BB |
| RS1901284  | 99,512,470 | BB | BB | AA | AB | AB |
| RS17765112 | 99,515,770 | AA | AA | BB | AB | AB |
| RS4850905  | 99,518,800 | AA | AA | AA | AB | AB |
| RS3792119  | 99,538,510 | AA | AA | AA | AA | AA |
| RS11890008 | 99,540,660 | AA | AA | AA | AA | AA |
| RS17022781 | 99,540,970 | AA | AA | AA | AA | AA |
| RS10179214 | 99,541,150 | BB | BB | BB | BB | BB |
| RS9808393  | 99,564,070 | BB | BB | BB | BB | BB |
| RS12998444 | 99,570,480 | AA | AA | AA | AB | AB |
| RS12712049 | 99,575,260 | AA | AA | BB | BB | BB |
| RS10210038 | 99,588,510 | AA | AA | AA | AA | AA |
| RS11123789 | 99,590,130 | BB | AA | AA | AA | AA |
| RS6718629  | 99,605,180 | AA | AA | AA | AA | AA |
| RS1568785  | 99,612,580 | BB | AA | BB | AB | AB |
| RS2177541  | 99,613,360 | AA | BB | AA | AA | AA |
| RS3811556  | 99,627,290 | BB | BB | BB | AB | AB |
| RS17022829 | 99,627,880 | BB | BB | AB | AB | AB |

|            |            |    |    |    |    |    |
|------------|------------|----|----|----|----|----|
| RS17022834 | 99,629,230 | AA | AA | AA | AB | AB |
| RS6719933  | 99,630,410 | AB | AB | AB | AB | AB |
| RS6745568  | 99,630,580 | BB | AA | BB | BB | BB |
| RS17022852 | 99,635,740 | BB | BB | AA | AB | AB |
| RS12712054 | 99,637,130 | BB | AA | BB | BB | BB |
| RS6728983  | 99,640,330 | BB | AA | AA | AB | AB |
| RS6749801  | 99,640,480 | AA | AA | AA | AA | AA |
| RS2030693  | 99,654,380 | AA | AB | AA | AA | AA |
| RS17022868 | 99,657,710 | BB | BB | BB | BB | BB |
| RS6542886  | 99,657,850 | AA | AA | BB | BB | BB |
| RS7560182  | 99,659,540 | AA | AA | BB | BB | BB |
| RS7561009  | 99,660,260 | AA | AA | AA | AA | AA |
| RS10189976 | 99,662,070 | AA | AA | BB | BB | BB |
| RS17022882 | 99,667,390 | AA | AA | AA | AB | AB |
| RS6728654  | 99,670,150 | AA | AA | AA | AA | AA |
| RS6730914  | 99,675,610 | BB | BB | BB | AB | AB |
| RS17022916 | 99,679,390 | BB | BB | BB | BB | BB |
| RS12712058 | 99,691,200 | BB | BB | AA | AB | AB |
| RS17022970 | 99,705,380 | AA | AA | AA | AA | AA |
| RS10496339 | 99,713,300 | BB | BB | BB | BB | BB |
| RS1404177  | 99,725,360 | BB | BB | AA | BB | BB |
| RS2091150  | 99,741,710 | BB | BB | BB | BB | BB |
| RS6721652  | 99,743,750 | AA | AA | AA | AA | AA |
| RS6542892  | 99,749,390 | BB | BB | BB | BB | BB |
| RS17023084 | 99,750,190 | AB | AB | BB | AB | AB |
| RS4851231  | 99,752,100 | BB | BB | AA | BB | BB |
| RS17023090 | 99,755,220 | AA | AA | AA | AA | AA |
| RS6755935  | 99,762,970 | AA | AA | BB | AA | AA |
| RS1366761  | 99,767,180 | AA | AA | AA | AA | AB |
| RS6719359  | 99,770,660 | BB | BB | BB | BB | BB |
| RS7604438  | 99,772,410 | AA | AA | AA | AA | AA |
| RS6732358  | 99,781,580 | AA | AA | AA | AA | AB |
| RS6723474  | 99,799,700 | BB | BB | BB | BB | BB |
| RS4621208  | 99,799,980 | AA | AA | BB | AA | AA |
| RS7608476  | 99,801,970 | AA | AA | AA | AA | AA |
| RS7601309  | 99,806,860 | BB | BB | AA | BB | BB |
| RS1366765  | 99,807,780 | BB | BB | AA | BB | BB |
| RS4481043  | 99,808,620 | BB | BB | BB | BB | BB |
| RS17023158 | 99,814,360 | AA | AA | AA | AA | AA |
| RS17023161 | 99,815,040 | AB | AA | BB | BB | AB |
| RS6542901  | 99,815,130 | BB | BB | BB | BB | BB |
| RS17023167 | 99,816,640 | AA | AA | AA | AA | AA |
| RS10191077 | 99,817,970 | BB | BB | BB | BB | BB |
| RS7586604  | 99,818,110 | AA | AA | AA | AA | AA |
| RS1864273  | 99,820,520 | AA | AA | BB | AA | AA |
| RS6731666  | 99,821,890 | BB | BB | BB | BB | BB |
| RS12473053 | 99,823,460 | BB | BB | BB | BB | BB |
| RS4850915  | 99,828,540 | BB | BB | AA | BB | BB |
| RS6756248  | 99,830,620 | AA | BB | AA | AA | AA |
| RS10865034 | 99,831,410 | BB | BB | BB | BB | BB |
| RS11123800 | 99,831,460 | BB | BB | AA | BB | BB |

|            |             |    |    |    |    |    |
|------------|-------------|----|----|----|----|----|
| RS17023216 | 99,832,580  | AA | BB | BB | AB | AB |
| RS4286327  | 99,835,380  | AA | AA | AA | AA | AA |
| RS17023236 | 99,842,640  | AA | AA | BB | AA | AA |
| RS6715454  | 99,847,380  | BB | AB | BB | AA | AA |
| RS17023254 | 99,848,960  | AA | AA | BB | AA | AA |
| RS17023256 | 99,856,580  | AA | AA | AA | AA | AA |
| RS17023265 | 99,860,460  | AA | AA | AA | AA | AA |
| RS7591889  | 99,860,500  | AA | AA | AA | AA | AA |
| RS17436705 | 99,860,660  | AA | AA | BB | AA | AA |
| RS11682684 | 99,868,140  | AB | AA | AA | AA | AA |
| RS13423929 | 99,871,860  | BB | BB | BB | BB | BB |
| RS6735012  | 99,882,570  | AA | BB | AA | BB | BB |
| RS7593337  | 99,894,660  | AA | BB | AA | BB | BB |
| RS6707538  | 99,911,380  | AA | AA | AA | AA | AA |
| RS17023310 | 99,913,810  | BB | BB | BB | BB | BB |
| RS7577040  | 99,921,380  | BB | AA | BB | AB | AB |
| RS6708436  | 99,936,160  | AA | AA | AA | AA | AA |
| RS13023088 | 99,942,740  | BB | BB | AB | BB | BB |
| RS10187195 | 99,947,760  | BB | AA | BB | AB | AB |
| RS10198187 | 99,947,980  | AA | AA | AA | AB | AB |
| RS17023362 | 99,969,710  | BB | BB | BB | AB | AB |
| RS17023404 | 99,985,700  | BB | BB | BB | BB | BB |
| RS10205511 | 99,990,480  | BB | AA | BB | BB | BB |
| RS17023424 | 99,996,180  | AA | AA | AA | AA | AA |
| RS10198062 | 100,002,100 | AA | AA | AA | AB | AB |
| RS11685341 | 100,003,200 | BB | AA | BB | AB | AB |
| RS7605430  | 100,014,000 | BB | AA | BB | AB | AB |
| RS11693242 | 100,029,300 | AA | AA | AA | AA | AA |
| RS12712063 | 100,029,700 | AA | AA | AA | AA | AA |
| RS13416841 | 100,030,000 | BB | BB | BB | BB | BB |
| RS17352801 | 100,031,100 | AA | BB | AA | AB | AB |
| RS2028137  | 100,032,100 | AA | AA | AA | AA | AA |
| RS4851244  | 100,037,900 | BB | BB | BB | BB | BB |
| RS735001   | 100,048,000 | BB | BB | BB | BB | BB |
| RS17023468 | 100,060,500 | AA | AA | AA | AA | AA |
| RS10177358 | 100,096,500 | AA | AA | AA | AA | AA |
| RS6749757  | 100,096,500 | BB | AA | BB | AB | AB |
| RS11694875 | 100,099,300 | BB | AA | BB | AB | AB |
| RS17023500 | 100,100,900 | BB | BB | BB | BB | BB |
| RS6745099  | 100,105,900 | AA | AA | AA | AB | AB |
| RS17437538 | 100,106,200 | BB | BB | BB | BB | BB |
| RS6706188  | 100,106,400 | AA | AA | AA | AB | AB |
| RS2309750  | 100,108,200 | AA | AA | AA | AB | AB |
| RS17023529 | 100,110,600 | BB | BB | BB | BB | BB |
| RS17023532 | 100,112,300 | BB | BB | BB | BB | BB |
| RS1561230  | 100,113,100 | BB | AA | BB | AB | AB |
| RS11885475 | 100,113,300 | AA | AA | AA | AA | AA |
| RS13000759 | 100,120,300 | BB | BB | BB | BB | BB |
| RS13415595 | 100,123,400 | AA | AA | AA | AA | AA |
| RS4851252  | 100,123,700 | AA | AA | AA | AA | AA |
| RS11681966 | 100,125,900 | BB | BB | BB | BB | BB |



|            |             |    |    |    |    |    |
|------------|-------------|----|----|----|----|----|
| RS17023569 | 100,126,000 | BB | BB | BB | BB | BB |
| RS17023571 | 100,126,300 | AA | BB | AA | AA | AA |
| RS12712066 | 100,129,400 | AA | BB | BB | AB | AB |
| RS10496344 | 100,130,600 | BB | BB | BB | BB | BB |
| RS11123813 | 100,132,100 | AA | AA | AA | AA | AA |
| RS4851256  | 100,141,500 | AA | BB | AA | AA | AA |
| RS7593261  | 100,156,300 | AA | BB | AA | AA | AA |
| RS11902629 | 100,161,500 | AA | AA | AA | AA | AA |
| RS11902705 | 100,161,600 | BB | AA | BB | BB | BB |
| RS4851262  | 100,162,700 | AA | AA | AA | AA | AA |
| RS17023659 | 100,165,400 | BB | BB | BB | BB | BB |
| RS4556997  | 100,181,300 | BB | AA | AA | AA | AA |
| RS4851266  | 100,184,900 | AA | AA | BB | AA | AA |
| RS13401183 | 100,186,100 | AA | AA | AA | AA | AA |
| RS6542919  | 100,186,600 | BB | BB | BB | BB | BB |
| RS9653442  | 100,191,800 | AA | BB | AA | BB | BB |
| RS4851269  | 100,196,800 | AA | AA | AA | BB | BB |
| RS1160542  | 100,198,600 | AA | BB | AA | BB | BB |
| RS2871344  | 100,205,900 | AA | AA | BB | AA | AA |
| RS13026283 | 100,209,100 | AA | AA | BB | AA | AA |
| RS17023801 | 100,217,500 | AA | BB | BB | BB | BB |
| RS10865036 | 100,227,000 | BB | BB | BB | AA | AA |
| RS2309811  | 100,228,800 | BB | BB | BB | AA | AA |
| RS12053126 | 100,231,100 | AA | AA | BB | AA | AA |
| RS13026143 | 100,231,800 | BB | AA | AA | BB | BB |
| RS6748892  | 100,232,500 | AA | BB | BB | BB | BB |
| RS17023825 | 100,234,900 | BB | AA | AA | AA | AA |
| RS17023838 | 100,236,800 | BB | BB | BB | BB | BB |
| RS4438499  | 100,243,200 | AA | BB | AA | BB | BB |
| RS6542922  | 100,245,300 | AA | BB | AA | BB | BB |
| RS12467008 | 100,248,900 | AA | AA | AA | AA | AA |
| RS10178929 | 100,250,200 | BB | BB | BB | BB | BB |
| RS2871341  | 100,254,900 | AA | AA | AA | AA | AA |
| RS4622752  | 100,258,400 | BB | BB | AA | BB | BB |
| RS6542923  | 100,258,900 | BB | BB | BB | BB | BB |
| RS6542924  | 100,259,500 | AA | AA | AA | AA | AA |
| RS6727379  | 100,261,700 | AA | AA | AA | AA | AA |
| RS2309819  | 100,266,100 | AA | BB | BB | BB | BB |
| RS2309821  | 100,266,700 | BB | BB | BB | BB | BB |
| RS2309823  | 100,268,000 | AA | AA | AA | AA | AA |
| RS2309824  | 100,268,100 | AA | AA | AA | AA | AA |
| RS13409545 | 100,278,800 | BB | AA | BB | AA | AA |
| RS7582180  | 100,278,900 | BB | AA | AA | AA | AA |
| RS10180423 | 100,285,400 | BB | AA | BB | AA | AA |
| RS10207566 | 100,294,500 | AA | AA | AA | AA | AA |
| RS11123826 | 100,302,700 | BB | BB | AA | BB | BB |
| RS6757754  | 100,317,700 | BB | AA | AA | BB | BB |
| RS2118468  | 100,319,000 | BB | AA | BB | BB | BB |
| RS13031508 | 100,319,200 | AA | AA | BB | AA | AA |
| RS17024021 | 100,322,200 | BB | BB | BB | BB | BB |
| RS11686880 | 100,322,700 | AA | AA | BB | AA | AA |

|            |             |    |    |    |    |    |
|------------|-------------|----|----|----|----|----|
| RS6728575  | 100,330,400 | BB | AA | AA | AA | AA |
| RS7598205  | 100,330,800 | BB | AA | AA | AA | AA |
| RS17024035 | 100,335,000 | AA | AB | BB | BB | BB |
| RS4850927  | 100,335,500 | AA | AA | BB | AA | AA |
| RS17024054 | 100,337,000 | AA | AA | AA | AA | AA |
| RS6738410  | 100,337,600 | AA | AA | BB | BB | BB |
| RS13392198 | 100,342,100 | BB | BB | AA | AA | AA |
| RS11685401 | 100,343,100 | BB | BB | BB | AA | AA |
| RS4640404  | 100,347,000 | AA | AA | AA | BB | BB |
| RS1437971  | 100,353,400 | BB | BB | BB | BB | BB |
| RS10206374 | 100,357,300 | AA | AA | BB | BB | BB |
| RS6542946  | 100,361,000 | AA | AA | BB | BB | BB |
| RS17024129 | 100,361,600 | AA | AA | BB | BB | BB |
| RS7585898  | 100,364,700 | AA | AA | BB | BB | BB |
| RS6716367  | 100,366,400 | AA | AA | BB | BB | BB |
| RS1370627  | 100,375,800 | AA | BB | BB | BB | BB |
| RS12467104 | 100,379,500 | BB | BB | BB | BB | BB |
| RS2099611  | 100,387,500 | BB | BB | BB | AA | AA |
| RS4149513  | 100,389,200 | AA | AA | BB | AA | AA |
| RS3791358  | 100,398,300 | BB | BB | AA | AA | AA |
| RS6740922  | 100,414,500 | BB | BB | BB | BB | BB |
| RS13416322 | 100,419,000 | AA | BB | AA | BB | BB |
| RS4851316  | 100,419,200 | AA | BB | AA | BB | BB |
| RS763962   | 100,419,900 | BB | AA | BB | AA | AA |
| RS11695568 | 100,424,900 | AA | AA | AA | AA | AA |
| RS7561516  | 100,425,600 | BB | BB | BB | BB | BB |
| RS750562   | 100,430,000 | BB | AA | BB | AA | AA |
| RS13383638 | 100,431,100 | AA | BB | AA | BB | BB |
| RS13398213 | 100,431,500 | BB | AA | BB | AA | AA |
| RS10204004 | 100,431,800 | AA | BB | AA | BB | BB |
| RS6717716  | 100,433,100 | AA | AA | AA | BB | BB |
| RS17024335 | 100,433,400 | AA | BB | AA | AA | AA |
| RS962556   | 100,434,200 | BB | BB | BB | AA | AB |
| RS13411940 | 100,453,400 | BB | AA | BB | BB | BB |
| RS17024368 | 100,454,000 | BB | AA | BB | BB | BB |
| RS1519661  | 100,454,700 | AA | BB | AA | AA | AA |
| RS753439   | 100,455,300 | AA | BB | AA | AA | AA |
| RS11123833 | 100,457,600 | BB | AA | BB | BB | BB |
| RS7568283  | 100,463,000 | AA | BB | AA | AA | AA |
| RS13428749 | 100,463,300 | AA | BB | AA | AA | AA |
| RS7568519  | 100,463,300 | BB | AA | BB | BB | BB |
| RS13393776 | 100,463,300 | BB | AA | BB | BB | BB |
| RS11123834 | 100,472,100 | AA | BB | AA | AA | AA |
| RS11900367 | 100,473,600 | AA | BB | AA | AA | AA |
| RS1000867  | 100,476,200 | BB | BB | BB | BB | BB |
| RS13389527 | 100,478,600 | AA | BB | AA | AA | AA |
| RS17024434 | 100,478,900 | BB | BB | BB | BB | BB |
| RS1370624  | 100,480,100 | AA | AA | AA | AA | AA |
| RS17024446 | 100,481,100 | BB | AA | BB | AA | AA |
| RS964559   | 100,488,200 | BB | BB | BB | AA | AA |
| RS12614705 | 100,489,200 | AA | AA | AA | AA | AA |

|            |             |    |    |    |    |    |
|------------|-------------|----|----|----|----|----|
| RS6718243  | 100,494,000 | AA | AA | AA | AA | AA |
| RS17024471 | 100,505,000 | BB | BB | BB | BB | BB |
| RS17024473 | 100,505,500 | BB | BB | BB | BB | BB |
| RS17024474 | 100,506,000 | BB | BB | BB | BB | BB |
| RS4147028  | 100,509,500 | BB | BB | AA | BB | BB |
| RS2176733  | 100,511,900 | BB | BB | BB | AA | AA |
| RS12474526 | 100,516,000 | BB | AA | AA | BB | BB |
| RS7423870  | 100,518,800 | AA | AA | BB | BB | BB |
| RS4851329  | 100,526,200 | BB | AA | AA | AB | AB |
| RS1533655  | 100,531,200 | BB | AA | AA | AB | AB |
| RS6753993  | 100,539,600 | BB | AA | AB | AB | AB |
| RS2139403  | 100,544,800 | AA | AA | AA | AB | AB |
| RS17640099 | 100,549,700 | BB | BB | BB | BB | BB |
| RS2971007  | 100,550,000 | AA | BB | BB | AB | AB |
| RS12469806 | 100,558,400 | AA | AA | AA | AA | AA |
| RS2309846  | 100,567,900 | AA | AA | BB | AB | AB |
| RS7594990  | 100,568,100 | AA | AA | AA | AA | AA |
| RS4851346  | 100,589,800 | BB | AA | AA | AB | AB |
| RS10178303 | 100,591,700 | AA | AA | AA | AA | AA |
| RS2971010  | 100,593,000 | BB | BB | BB | AB | AB |
| RS13386350 | 100,606,100 | AA | AA | BB | BB | BB |
| RS1533657  | 100,607,800 | AA | AA | AA | AA | AA |
| RS2139405  | 100,608,800 | BB | BB | AA | AA | AA |
| RS2946601  | 100,609,100 | BB | BB | AA | AA | AA |
| RS2222282  | 100,611,200 | AA | AA | AA | AA | AA |
| RS10191620 | 100,613,600 | BB | BB | AA | AA | AA |
| RS6738852  | 100,614,800 | AA | AA | BB | BB | BB |
| RS10187537 | 100,617,200 | BB | BB | AB | AA | AA |
| RS4599142  | 100,620,700 | BB | BB | AA | AA | AA |
| RS13402095 | 100,620,900 | AA | AA | AA | AA | AA |
| RS11695640 | 100,630,800 | AA | AA | AA | AA | AA |
| RS10153955 | 100,631,300 | AA | AA | BB | BB | BB |
| RS4850942  | 100,641,300 | AB | AA | BB | BB | BB |
| RS4851359  | 100,650,000 | AA | AA | AA | AA | AA |
| RS10201136 | 100,652,500 | AA | AA | AA | AA | AA |
| RS4851361  | 100,652,700 | AA | AA | BB | BB | BB |
| RS4850944  | 100,653,300 | AA | AA | AA | AA | AA |
| RS17024601 | 100,657,500 | BB | BB | AA | AA | AA |
| RS4851365  | 100,657,600 | AA | AA | BB | BB | BB |
| RS10209092 | 100,658,500 | BB | BB | AA | AA | AA |
| RS3112238  | 100,662,500 | BB | BB | BB | BB | BB |
| RS2942894  | 100,663,400 | AA | AA | AA | AA | AA |
| RS2942895  | 100,663,600 | BB | BB | BB | BB | BB |
| RS2971024  | 100,663,900 | AA | AA | AA | AA | AA |
| RS2942905  | 100,674,700 | BB | BB | BB | BB | BB |
| RS2942909  | 100,676,500 | AA | AA | AA | AA | AA |
| RS1398867  | 100,676,700 | AA | AA | AA | AA | AA |
| RS6735550  | 100,677,500 | BB | BB | BB | BB | BB |
| RS3112252  | 100,678,500 | AB | AB | AB | AB | AB |
| RS1355819  | 100,678,900 | AA | AA | AA | AA | AA |
| RS1355820  | 100,679,000 | AA | AA | AA | AA | AA |

|            |             |    |    |    |    |    |
|------------|-------------|----|----|----|----|----|
| RS2942879  | 100,682,700 | BB | BB | BB | BB | BB |
| RS3112256  | 100,688,300 | AA | AA | BB | AB | AB |
| RS6729336  | 100,688,600 | AA | AA | AA | AA | AA |
| RS2970991  | 100,688,600 | AA | AA | BB | AB | AB |
| RS2942884  | 100,690,000 | BB | BB | AA | AB | AB |
| RS7558261  | 100,691,100 | BB | BB | AA | AB | AB |
| RS13384306 | 100,691,600 | BB | BB | BB | BB | BB |
| RS11901892 | 100,693,000 | BB | BB | BB | BB | BB |
| RS3112257  | 100,693,300 | BB | BB | AA | AB | AB |
| RS12615536 | 100,695,600 | BB | BB | AA | AB | AB |
| RS11123842 | 100,704,400 | AA | AA | AB | AB | AB |
| RS11123843 | 100,704,500 | BB | BB | AA | AB | AB |
| RS4851370  | 100,704,900 | AA | AA | BB | AB | AB |
| RS17024677 | 100,706,900 | AA | AA | AA | AA | AA |
| RS907794   | 100,708,000 | BB | BB | AA | BB | BB |
| RS1567803  | 100,709,400 | BB | AA | AA | AB | AB |
| RS12621996 | 100,709,800 | BB | AA | AA | AB | AB |
| RS1567804  | 100,710,100 | BB | AA | AA | AB | AB |
| RS1567805  | 100,710,100 | AA | BB | BB | AB | AB |
| RS6708706  | 100,724,300 | BB | BB | BB | BB | BB |
| RS12465343 | 100,736,900 | AA | AA | AA | AA | AA |
| RS1107634  | 100,745,400 | BB | AA | BB | BB | BB |
| RS17024707 | 100,747,200 | BB | BB | BB | BB | BB |
| RS6746018  | 100,747,300 | BB | AA | BB | BB | BB |
| RS10172286 | 100,750,400 | BB | AA | BB | BB | BB |
| RS6741485  | 100,754,700 | BB | BB | BB | BB | BB |
| RS10177037 | 100,760,100 | BB | BB | BB | BB | BB |
| RS17024737 | 100,762,000 | BB | BB | BB | BB | BB |
| RS12467539 | 100,768,800 | AA | AA | AA | AA | AA |
| RS10198664 | 100,773,600 | BB | AA | BB | BB | BB |
| RS7577100  | 100,776,000 | BB | BB | BB | BB | BB |
| RS7565981  | 100,790,800 | BB | BB | BB | BB | BB |
| RS11893548 | 100,795,200 | BB | AA | BB | BB | BB |
| RS10172146 | 100,800,700 | BB | BB | BB | BB | BB |
| RS6542993  | 100,807,100 | AA | AA | AA | AA | AA |
| RS13028398 | 100,807,300 | AA | AA | AA | AB | AB |
| RS4349369  | 100,810,200 | AA | AA | AA | AA | AA |
| RS17024852 | 100,816,300 | AA | AA | AA | AA | AA |
| RS3860456  | 100,816,700 | BB | BB | BB | BB | BB |
| RS3888170  | 100,817,100 | AA | AA | AA | AA | AA |
| RS7587153  | 100,818,900 | BB | BB | BB | BB | BB |
| RS7587470  | 100,819,200 | BB | BB | BB | AB | AB |
| RS7587573  | 100,819,300 | AA | AA | AA | AA | AA |
| RS7582455  | 100,838,100 | BB | BB | BB | AA | AA |
| RS2043534  | 100,847,300 | BB | AA | BB | AA | AB |
| RS6542996  | 100,852,300 | AA | BB | AA | BB | BB |
| RS12472319 | 100,853,900 | BB | AA | BB | AA | AA |
| RS13387032 | 100,857,900 | BB | BB | BB | BB | BB |
| RS13390036 | 100,858,100 | BB | BB | BB | BB | BB |
| RS2164319  | 100,862,500 | AA | AA | AA | AB | AB |
| RS13012765 | 100,864,600 | AA | BB | AA | BB | BB |

|            |             |    |    |    |    |    |
|------------|-------------|----|----|----|----|----|
| RS7595380  | 100,869,200 | BB | BB | BB | BB | BB |
| RS1369482  | 100,869,800 | AA | AA | AA | AA | AA |
| RS1369481  | 100,878,400 | AA | BB | BB | AA | AA |
| RS17654748 | 100,878,900 | BB | AA | BB | BB | BB |
| RS17654772 | 100,879,000 | AA | AA | AA | AA | AA |
| RS10194413 | 100,885,300 | BB | BB | BB | AB | AB |
| RS4851377  | 100,888,700 | AA | BB | BB | AB | AB |
| RS12479086 | 100,890,000 | BB | BB | BB | BB | BB |
| RS13394520 | 100,890,200 | AA | BB | BB | BB | BB |
| RS4851379  | 100,890,700 | AA | AA | AA | AB | AB |
| RS7570190  | 100,894,500 | AA | AA | AA | AA | AA |
| RS11674168 | 100,895,600 | AA | AA | AA | AA | AA |
| RS11676107 | 100,902,900 | AA | AA | AA | AB | AB |
| RS13026599 | 100,907,700 | AA | AA | BB | AA | AA |
| RS17717414 | 100,913,000 | AA | BB | BB | BB | BB |
| RS12466423 | 100,913,500 | BB | BB | BB | BB | BB |
| RS3754675  | 100,916,300 | BB | BB | BB | BB | BB |
| RS17025005 | 100,920,000 | AA | AA | AA | AA | AA |
| RS6542999  | 100,920,200 | AA | AA | AA | AA | AA |
| RS13010122 | 100,926,500 | BB | BB | AA | AA | AA |
| RS4851384  | 100,928,100 | AA | AA | AA | AA | AA |
| RS10170955 | 100,928,300 | BB | BB | BB | BB | BB |
| RS10206435 | 100,928,900 | BB | BB | AA | AB | AA |
| RS12612424 | 100,937,000 | AA | AA | AA | AA | AA |
| RS882272   | 100,942,600 | AA | AA | BB | BB | BB |
| RS4851391  | 100,946,200 | AA | AA | AA | AA | AA |
| RS9679638  | 100,960,900 | AA | AA | AA | AA | AA |
| RS17025130 | 100,961,300 | AA | AA | AA | AA | AA |
| RS1542178  | 100,961,900 | AA | AA | BB | BB | BB |
| RS2278727  | 100,965,100 | BB | AA | BB | BB | BB |
| RS1053096  | 100,979,000 | BB | AA | AA | BB | BB |
| RS10189697 | 100,983,900 | BB | BB | BB | AB | AB |
| RS2278723  | 100,985,800 | BB | AA | AA | BB | BB |
| RS17025161 | 100,985,800 | AA | AA | AA | AA | AA |
| RS2278721  | 100,987,400 | BB | BB | BB | BB | BB |
| RS17025170 | 100,988,100 | BB | BB | BB | BB | BB |
| RS17663443 | 101,003,400 | AB | AB | AB | BB | BB |
| RS3739014  | 101,005,300 | AA | BB | BB | AA | AA |
| RS12474501 | 101,009,300 | BB | AA | BB | BB | BB |
| RS13412722 | 101,013,200 | BB | BB | BB | AB | AB |
| RS11123859 | 101,032,300 | BB | BB | BB | AA | AA |
| RS17025231 | 101,043,100 | BB | BB | BB | BB | BB |
| RS10496351 | 101,046,600 | AA | BB | AA | AA | AA |
| RS2121367  | 101,049,900 | BB | AA | AA | AA | AA |
| RS6543013  | 101,057,600 | BB | BB | AA | BB | BB |
| RS4851400  | 101,063,100 | BB | BB | BB | BB | BB |
| RS6727200  | 101,064,600 | BB | BB | AA | BB | BB |
| RS11678957 | 101,065,600 | AA | AA | AA | AB | AB |
| RS2165428  | 101,072,400 | BB | BB | BB | AB | AB |
| RS2871392  | 101,082,800 | BB | BB | BB | AB | AB |
| RS2592392  | 101,089,800 | BB | BB | AA | AA | AA |

|            |             |    |    |    |    |    |
|------------|-------------|----|----|----|----|----|
| RS812717   | 101,094,900 | AA | AA | AB | AA | AA |
| RS6543018  | 101,096,700 | BB | BB | AA | AA | AA |
| RS7559325  | 101,097,000 | AA | AA | AA | AB | AB |
| RS2016986  | 101,106,100 | BB | AA | AA | BB | BB |
| RS935066   | 101,106,500 | AA | AA | AA | AB | AB |
| RS732136   | 101,106,700 | BB | BB | BB | AB | AB |
| RS12233027 | 101,107,700 | BB | BB | BB | BB | BB |
| RS12472431 | 101,116,200 | AA | AA | AA | AA | AA |
| RS11686264 | 101,116,400 | AA | AA | AA | AB | AB |
| RS13412911 | 101,121,800 | AA | BB | AA | AA | AA |
| RS7604060  | 101,126,300 | BB | BB | BB | BB | BB |
| RS11691031 | 101,145,800 | BB | AA | BB | AA | AA |
| RS1620893  | 101,163,200 | AA | BB | AA | BB | BB |
| RS4850962  | 101,168,100 | AA | AA | AA | AB | AB |
| RS6543023  | 101,182,400 | AA | AA | AA | AA | AA |
| RS7603503  | 101,186,100 | AA | AA | AA | AA | AA |
| RS13408291 | 101,214,700 | AA | AA | AA | AA | AA |
| RS1660702  | 101,232,400 | AA | BB | BB | BB | BB |
| RS10182839 | 101,243,900 | BB | BB | BB | BB | BB |
| RS750783   | 101,255,700 | BB | BB | AB | AB | BB |
| RS1192793  | 101,264,300 | AB | BB | BB | BB | BB |
| RS17025374 | 101,282,700 | AB | BB | BB | BB | BB |
| RS13031025 | 101,283,900 | AB | AA | BB | AB | AB |
| RS17025378 | 101,286,000 | AB | BB | BB | BB | BB |
| RS17190412 | 101,289,200 | AB | BB | AA | AB | AB |
| RS2056716  | 101,295,400 | AB | BB | AA | AA | AA |
| RS4851420  | 101,322,600 | AA | AA | AA | AA | AA |
| RS4539813  | 101,331,800 | BB | BB | BB | BB | BB |
| RS6749888  | 101,337,300 | BB | BB | BB | BB | BB |
| RS6735216  | 101,337,400 | AA | AA | AA | AA | AA |
| RS6753727  | 101,338,000 | AA | AA | AA | AB | AB |
| RS11674064 | 101,350,500 | AB | AA | AA | AA | AA |
| RS4850969  | 101,352,200 | AB | AA | AA | AA | AA |
| RS3923053  | 101,352,800 | BB | BB | BB | AB | AB |
| RS7572740  | 101,354,900 | AA | AA | AA | AA | AA |
| RS7584951  | 101,361,200 | AB | BB | BB | BB | BB |
| RS9308846  | 101,364,200 | AB | AA | AA | AB | AB |
| RS4069937  | 101,377,400 | AA | BB | AA | AA | AA |
| RS6716306  | 101,381,200 | BB | AA | BB | AB | AB |
| RS4241206  | 101,383,500 | BB | AA | BB | AB | AB |
| RS11689348 | 101,395,700 | BB | BB | BB | AB | AB |
| RS12620464 | 101,396,100 | AA | BB | AA | AA | AA |
| RS908136   | 101,398,200 | AA | AA | AA | AA | AA |
| RS7607798  | 101,409,500 | AA | AA | AA | AA | AA |
| RS6543046  | 101,409,700 | BB | BB | BB | BB | BB |
| RS2037083  | 101,413,700 | BB | AA | BB | BB | BB |
| RS17025611 | 101,418,300 | AA | AA | AA | AA | AA |
| RS938301   | 101,419,600 | BB | AA | BB | BB | BB |
| RS6705262  | 101,421,500 | AA | BB | AA | AA | AA |
| RS11123880 | 101,422,900 | AA | BB | AA | AA | AA |
| RS7583866  | 101,431,200 | BB | BB | BB | AB | AB |

|            |             |    |    |    |    |    |
|------------|-------------|----|----|----|----|----|
| RS12712105 | 101,431,700 | AA | BB | AA | AB | AB |
| RS4850977  | 101,432,400 | BB | AA | BB | BB | BB |
| RS4850978  | 101,432,400 | BB | AA | BB | BB | BB |
| RS4851454  | 101,447,000 | BB | BB | BB | AB | AB |
| RS6720584  | 101,447,400 | AB | BB | AA | AA | AA |
| RS7574003  | 101,447,600 | AB | BB | BB | BB | BB |
| RS6707298  | 101,456,200 | AB | BB | BB | BB | BB |
| RS11694135 | 101,472,000 | AA | AA | AA | AA | AA |
| RS9653469  | 101,476,000 | BB | BB | BB | BB | BB |
| RS17025718 | 101,482,200 | BB | BB | BB | BB | BB |
| RS1509493  | 101,489,200 | AA | AA | AA | AA | AA |
| RS1995826  | 101,495,900 | AB | AA | BB | AB | AB |
| RS10206804 | 101,498,900 | AB | AA | BB | AB | AB |
| RS1848699  | 101,504,300 | AB | BB | AA | AB | AB |
| RS1509497  | 101,504,600 | AB | BB | AA | AB | BB |
| RS3106053  | 101,509,800 | BB | BB | BB | BB | BB |
| RS6745920  | 101,512,100 | BB | BB | BB | BB | BB |
| RS290775   | 101,521,600 | AA | AA | AA | AA | AA |
| RS6543072  | 101,522,700 | BB | BB | BB | AB | AB |
| RS4308140  | 101,533,300 | AA | AA | AA | AB | AB |
| RS17195147 | 101,534,300 | BB | BB | BB | BB | BB |
| RS17025782 | 101,534,400 | AA | AA | AA | AA | AA |
| RS6543074  | 101,534,400 | BB | BB | BB | AB | AB |
| RS7585029  | 101,543,400 | AB | BB | BB | AB | AB |
| RS7592857  | 101,545,700 | AB | BB | AA | AB | AB |
| RS13420057 | 101,552,200 | AA | AA | AA | AA | AA |
| RS6725026  | 101,557,200 | AB | AA | BB | AA | AA |
| RS6543079  | 101,562,900 | AB | BB | BB | AB | AB |
| RS7355302  | 101,592,400 | AB | BB | AA | AB | AB |
| RS10197455 | 101,594,000 | BB | BB | BB | AB | AB |
| RS17025912 | 101,614,500 | AA | AA | AA | AA | AA |
| RS878203   | 101,618,100 | AA | AA | AA | AA | AA |
| RS1018218  | 101,618,400 | BB | BB | BB | BB | BB |
| RS1018219  | 101,618,400 | BB | BB | BB | BB | BB |
| RS4851475  | 101,628,000 | AB | AA | BB | AB | AB |
| RS951796   | 101,636,800 | BB | BB | BB | BB | BB |
| RS10202056 | 101,640,800 | AA | AA | AA | AA | AA |
| RS7598866  | 101,641,000 | AB | AA | AA | AA | AA |
| RS10194088 | 101,641,000 | AB | AA | BB | BB | BB |
| RS10496359 | 101,657,900 | AA | AA | AA | AA | AA |
| RS2016677  | 101,658,700 | AA | AA | AA | BB | BB |
| RS6543085  | 101,661,300 | AB | AA | BB | BB | BB |
| RS13396452 | 101,677,500 | AA | AA | AA | AA | AA |
| RS17025961 | 101,687,000 | AA | AA | AA | AA | AA |
| RS7597661  | 101,717,500 | BB | AB | BB | BB | BB |
| RS17026045 | 101,753,500 | BB | BB | BB | BB | BB |
| RS17026058 | 101,764,000 | BB | BB | BB | AB | AB |
| RS17026061 | 101,764,100 | BB | BB | BB | AA | AB |
| RS6733385  | 101,773,800 | AA | AA | AA | AB | AB |
| RS6543095  | 101,779,000 | BB | AA | BB | AB | AB |
| RS4851494  | 101,781,700 | BB | BB | BB | AB | AB |

|            |             |    |    |    |    |    |
|------------|-------------|----|----|----|----|----|
| RS12329012 | 101,794,900 | BB | BB | BB | BB | BB |
| RS2236936  | 101,810,300 | AA | AA | AA | AB | AB |
| RS7599763  | 101,824,000 | AA | AA | AA | AA | AA |
| RS17802002 | 101,829,000 | AB | AA | AA | AA | AA |
| RS2158816  | 101,834,100 | AA | AA | AA | AB | AB |
| RS13425874 | 101,844,800 | BB | AA | BB | BB | BB |
| RS3771903  | 101,845,500 | BB | BB | BB | AB | AA |
| RS9967668  | 101,854,300 | BB | BB | BB | AB | AB |
| RS7574674  | 101,872,100 | BB | AA | BB | AB | AB |
| RS17746734 | 101,904,200 | AB | AA | BB | AA | AB |
| RS2214890  | 101,909,100 | BB | AA | BB | AB | AB |
| RS12373806 | 101,909,800 | AB | AA | BB | AA | AA |
| RS12990046 | 101,909,900 | AA | AA | AA | AA | AA |
| RS11688863 | 101,917,300 | AB | BB | AA | AB | AB |
| RS12185627 | 101,927,200 | AB | BB | AA | AB | AB |
| RS4624399  | 101,928,200 | BB | BB | BB | BB | BB |
| RS10865049 | 101,937,500 | AB | BB | BB | BB | BB |
| RS1859716  | 101,939,900 | AA | AB | AA | AB | AB |
